# Supplementary material for: Preparation of carboxylic arylphosphines by hydrolysis of the trifluoromethyl group
Source: Royal Society of Chemistry journal article supplement (doi:10.1039/d2ra00420h), 2022-01-01
Supplement: d2ra00420h1.pdf [file d2ra00420h1.pdf]

## Supplementary information

### **Preparation of carboxylic-trifluoromethylated phosphines by hydrolysis of the trifluoromethyl group**

Daniel Herrera, Daniel Peral, J. Carles Bayón\*

Department of Chemistry, Universitat Autònoma de Barcelona, Bellaterra, Spain

|                                                                                                                    | <b>Page</b> |
|--------------------------------------------------------------------------------------------------------------------|-------------|
| <b>Figure S1.</b>                                                                                                  | S2          |
| <b>Figure S2.</b>                                                                                                  | S3          |
| <b>Figure S3.</b>                                                                                                  | S4          |
| <b>Figure S4.</b>                                                                                                  | S5          |
| <b>Figure S5.</b>                                                                                                  | S5          |
| <b>Table S1.</b>                                                                                                   | S6          |
| <b>General procedure for the synthesis of <i>trans</i>-[PdCl<sub>2</sub>L<sub>2</sub>] of MC1 and MC2 ligands:</b> | S6          |
| <b>Crystallographic data</b>                                                                                       | S7          |
| <b>NMR spectra of phosphine compounds and derivatives</b>                                                          | S9          |

**Experiment 1**

[SP1] = 0.15 M

[H<sub>3</sub>BO<sub>3</sub>] = 0.8 M

[SO<sub>3</sub>] = 10.5 M

**Experiment 2**

[SP1] = 0.15 M

[H<sub>3</sub>BO<sub>3</sub>] = 0.8 M

[SO<sub>3</sub>] = 12 M

**Experiment 3**

[SP1] = 0.15 M

[H<sub>3</sub>BO<sub>3</sub>] = 2.0 M

[SO<sub>3</sub>] = 12 M

**Experiment 4**

[SP1] = 0.15 M

[H<sub>3</sub>BO<sub>3</sub>] = 2.4 M

[SO<sub>3</sub>] = 10.5 M

**Experiment 5**

[SP1] = 0.10 M

[H<sub>3</sub>BO<sub>3</sub>] = 1.5 M

[SO<sub>3</sub>] = 7 M

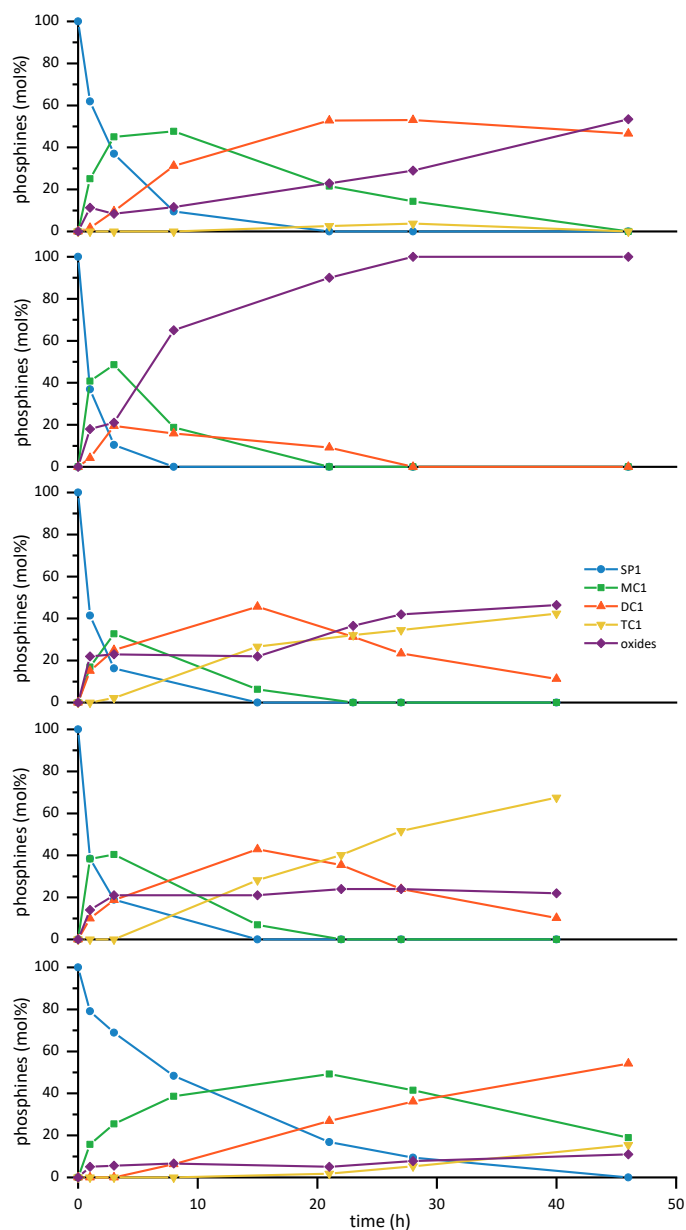

**Figure S1.** Optimization of reaction conditions for the hydrolysis of phosphine SP1. Products extracted with Et<sub>2</sub>O from the aqueous phase after quenching in water. % of compounds correspond to the integration of the phosphorus products in <sup>31</sup>P{<sup>1</sup>H} NMR. [SP1] = 0.15 M, [H<sub>3</sub>BO<sub>3</sub>] = 0.8 M, [SO<sub>3</sub>] = 10.5 M was used in the experiments

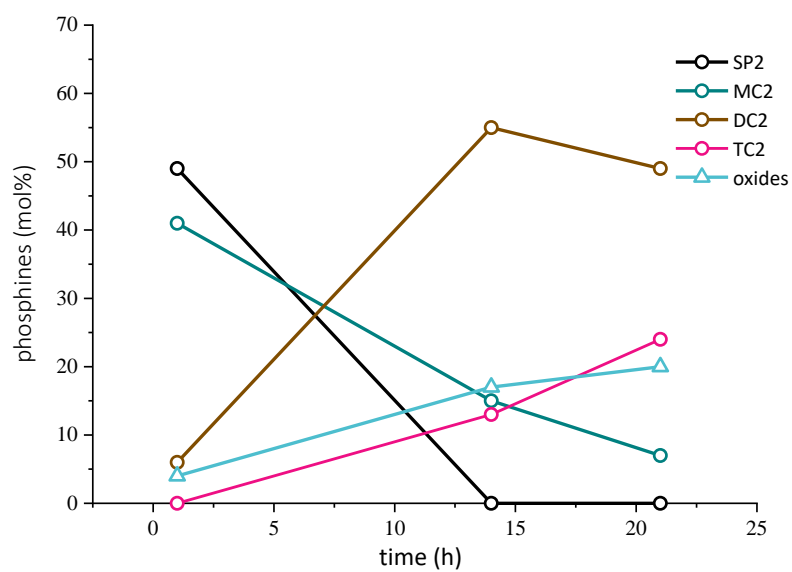

**Figure S2.** Optimization of reaction conditions for the hydrolysis of phosphine SP2. Products extracted with Et<sub>2</sub>O from the aqueous phase after quenching in water. % of compounds correspond to the integration of the phosphorus products in <sup>31</sup>P{<sup>1</sup>H} NMR. 0.6 mmol of starting phosphine SP2 were used in the experiments

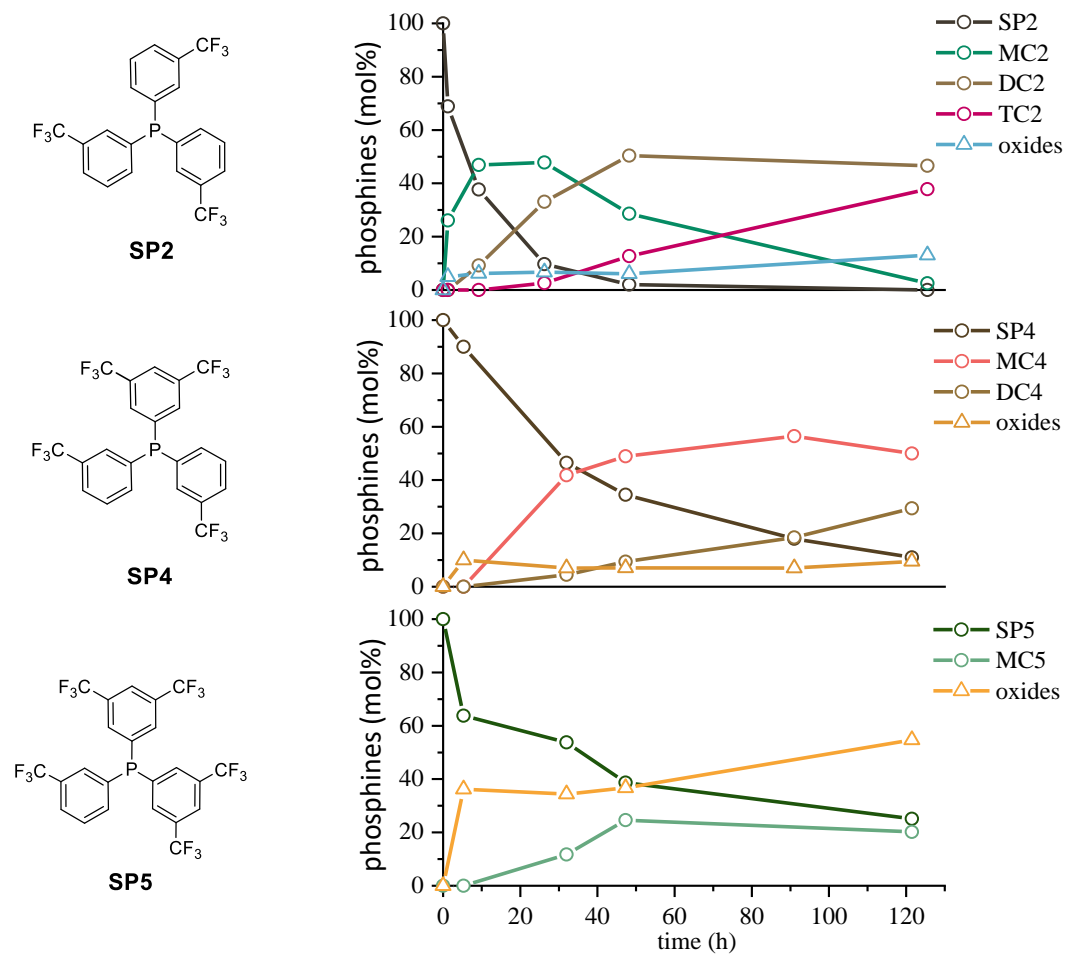

**Figure S3.** Evolution of the reaction of hydrolysis in phosphines SP2, SP4 and SP5 with time. Products extracted with Et<sub>2</sub>O from the aqueous phase after quenching in water. % of compounds correspond to the integration of the phosphorus products in <sup>31</sup>P{<sup>1</sup>H} NMR. Reaction conditions: 0.6 mmol of phosphine. [Phosphine] = 0.1 M, [H<sub>3</sub>BO<sub>3</sub>] = 0.5 M, [SO<sub>3</sub>] = 6.7 M.

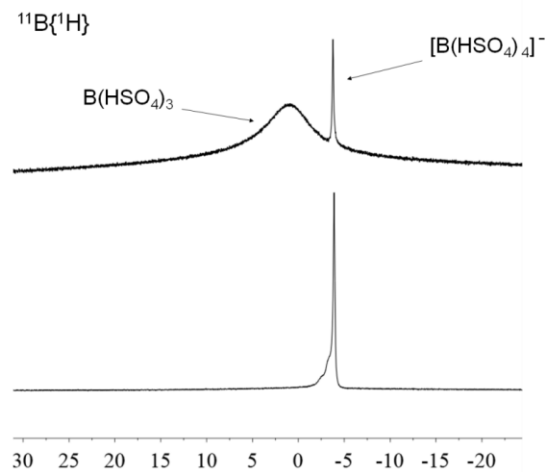

**Figure S4.**  $^{11}\text{B}\{^1\text{H}\}$  NMR (128.38 MHz) of a solution of boric acid in sulfuric acid before (**top**) and after (**bottom**) the addition of oleum.  $\delta$  in ppm. Signals relative to  $\text{BF}_3\cdot\text{Et}_2\text{O}$  (0.0 ppm) used as external standard)

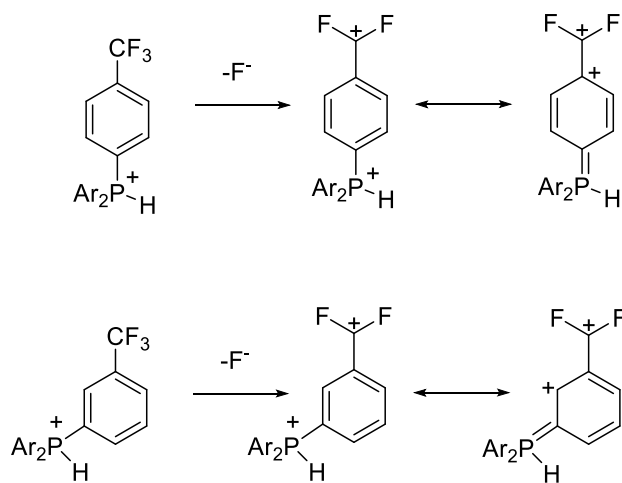

**Figure S5.** Delocalisation of the phosphonium positive charge.

**Table S1.** Values of  $^1J_{\text{PSe}}$  for the selenide derivatives of the carboxylic and trifluoromethylated triarylphosphines and selected values from the literature

| Phosphine                    | CF <sub>3</sub> groups | CO <sub>2</sub> H groups | CO <sub>2</sub> H subst. pattern | $^1J_{\text{PSe}}$ exp. <sup>a</sup> | $^1J_{\text{PSe}}$ calc. <sup>b</sup> |
|------------------------------|------------------------|--------------------------|----------------------------------|--------------------------------------|---------------------------------------|
| PPh <sub>3</sub>             | 0                      | 0                        | -                                | 731                                  | -                                     |
| <i>p</i> -DPPBA <sup>c</sup> | 0                      | 1                        | <i>para</i>                      | 740 <sup>d</sup>                     | 740                                   |
| <b>DC1</b>                   | 1                      | 2                        | <i>para</i>                      | 761                                  | 761                                   |
| <b>DC2</b>                   | 1                      | 2                        | <i>meta</i>                      | 761                                  | 761                                   |
| <b>MC1</b>                   | 2                      | 1                        | <i>para</i>                      | 764                                  | 764                                   |
| <b>MC2</b>                   | 2                      | 1                        | <i>meta</i>                      | 764                                  | 764                                   |
| <b>DC4</b>                   | 2                      | 2                        | <i>meta</i>                      | 773                                  | 773                                   |
| <b>SP1</b>                   | 3                      | 0                        | -                                | 766 <sup>d</sup>                     | 767                                   |
| <b>SP2</b>                   | 3                      | 0                        | -                                | 767 <sup>d</sup>                     | 767                                   |
| <b>MC4</b>                   | 3                      | 1                        | <i>meta</i>                      | 776                                  | 776                                   |
| <b>SP4</b>                   | 4                      | 0                        | -                                | 780 <sup>d</sup>                     | 779                                   |
| <b>MC5</b>                   | 4                      | 1                        | <i>meta</i>                      | 786                                  | 788                                   |
| <b>SP5</b>                   | 5                      | 0                        | -                                | 791 <sup>d</sup>                     | 791                                   |
| <b>SP3</b>                   | 6                      | 0                        | -                                | 800 <sup>d</sup>                     | 803                                   |

<sup>a</sup> Values obtained from the  $^{31}\text{P}\{^1\text{H}\}$  in CDCl<sub>3</sub>. See text for more details <sup>b</sup> Values estimated from equation 2. <sup>c</sup> *p*-(diphenylphosphino)benzoic acid. <sup>d</sup> Values from the literature <sup>i</sup>

#### General procedure for the synthesis of *trans*-[PdCl<sub>2</sub>L<sub>2</sub>] of MC1 and MC2 ligands:

In an example reaction, 0.38 mmol of the corresponding carboxylic phosphine were dissolved in a mixture of 3 ml of acetonitrile and 1 ml of CH<sub>2</sub>Cl<sub>2</sub>. A solution of 0.19 mmol of palladium (II) chloride in 1 ml of acetonitrile was added to the solution of the phosphine and the mixture was stirred at 40 °C for 1 h. After that time, the palladium complex precipitated as a yellow solid. The solution was cooled down to room temperature and the complex was collected by filtration and washed 3 times with acetonitrile. The MC2 complex showed high solubility in several solvents (CH<sub>2</sub>Cl<sub>2</sub>, Et<sub>2</sub>O, acetone, CH<sub>3</sub>CN and ethyl acetate) and could not be precipitated from the reaction mixture. Therefore, the solvent was vacuum evaporated and the yellow solid was recrystallised from CH<sub>2</sub>Cl<sub>2</sub>/cyclohexane.

#### Data for *trans*-[PdCl<sub>2</sub>(MC1)<sub>2</sub>]

$^{31}\text{P}\{^1\text{H}\}$  NMR (161.98 MHz, acetone- *d*6),  $\delta$  (ppm): 25.50 (s).  $^1\text{H}$  NMR (400.13 MHz, acetone- *d*6),  $\delta$  (ppm): 8.16 (d, 4H, H<sub>C3</sub>{C<sub>6</sub>H<sub>4</sub>CO<sub>2</sub>H},  $^3J_{\text{HH}} = 8.0$  Hz); 7.99 (m, 12H, H<sub>C2</sub>{C<sub>6</sub>H<sub>4</sub>CF<sub>3</sub>}-H<sub>C2</sub>{C<sub>6</sub>H<sub>4</sub>CO<sub>2</sub>H}); 7.88 (d, 8H, H<sub>C3</sub>{C<sub>6</sub>H<sub>4</sub>CF<sub>3</sub>},  $^3J_{\text{HH}} = 8.0$  Hz).  $^{19}\text{F}\{^1\text{H}\}$  NMR (376.50 MHz, acetone- *d*6),  $\delta$  (ppm): -62.54 (s). **HR-MS** (ESI<sup>+</sup> *m/z*) [M+Na]<sup>+</sup>: calculated for [C<sub>42</sub>H<sub>26</sub>Cl<sub>2</sub>F<sub>12</sub>O<sub>4</sub>P<sub>2</sub>PdNa]<sup>+</sup> 1082.9419; found 1082.9386.

**Elemental analysis:** calculated for C<sub>42</sub>H<sub>26</sub>Cl<sub>2</sub>F<sub>12</sub>O<sub>4</sub>P<sub>2</sub>Pd: C, 47.50; H, 2.47; found: C, 47.04; H, 2.41.

### Data for *trans*-[PdCl<sub>2</sub>(MC<sub>2</sub>)<sub>2</sub>]

<sup>31</sup>P{<sup>1</sup>H} NMR (161.98 MHz, acetone-*d*<sub>6</sub>), δ (ppm): 26.37 (s). <sup>1</sup>H NMR (400.13 MHz, acetone-*d*<sub>6</sub>), δ (ppm): 8.43 (m, 2H, H<sub>C2</sub>{C<sub>6</sub>H<sub>4</sub>CF<sub>3</sub>}); 8.25 (d, 2H, H<sub>C4</sub>{C<sub>6</sub>H<sub>4</sub>CO<sub>2</sub>H}, <sup>3</sup>J<sub>HH</sub> = 7.8 Hz); 8.15 (m, 6H, H<sub>C2</sub>{C<sub>6</sub>H<sub>4</sub>CF<sub>3</sub>}-H<sub>C6</sub>{C<sub>6</sub>H<sub>4</sub>CO<sub>2</sub>H}); 8.02 (*pseudo*-q, 4H, H<sub>C6</sub>{C<sub>6</sub>H<sub>4</sub>CF<sub>3</sub>}, <sup>3</sup>J<sub>HH</sub> = 7.7, <sup>3</sup>J<sub>HP</sub> = 6.0 Hz); 7.95 (d, 4H, H<sub>C4</sub>{C<sub>6</sub>H<sub>4</sub>CF<sub>3</sub>}, <sup>3</sup>J<sub>HH</sub> = 7.5 Hz); 7.79 (t, 4H, H<sub>C5</sub>{C<sub>6</sub>H<sub>4</sub>CF<sub>3</sub>}, <sup>3</sup>J<sub>HH</sub> = 7.5 Hz); 7.73 (t, 2H, H<sub>C5</sub>{C<sub>6</sub>H<sub>4</sub>CO<sub>2</sub>H}, <sup>3</sup>J<sub>HH</sub> = 7.8 Hz). <sup>19</sup>F{<sup>1</sup>H} NMR (376.50 MHz, acetone-*d*<sub>6</sub>), δ (ppm): -62.26 (s). **HR-MS** (ESI<sup>+</sup> *m/z*) [M+Na]<sup>+</sup>: calculated for [C<sub>42</sub>H<sub>26</sub>Cl<sub>2</sub>F<sub>12</sub>O<sub>4</sub>P<sub>2</sub>PdNa]<sup>+</sup> 1082.9419; found 1082.9376. **Elemental analysis**: calculated for C<sub>42</sub>H<sub>26</sub>Cl<sub>2</sub>F<sub>12</sub>O<sub>4</sub>P<sub>2</sub>Pd: C, 47.50; H, 2.47; found: C, 47.32; H, 2.81.

### Crystallographic data

An empirical absorption correction was applied to the gathered data (SADABS).<sup>ii</sup> The structures were solved by direct methods and refined by full-matrix least-squares methods on *F*<sup>2</sup> using SHELXL-2013.<sup>iii</sup> Plot of the structures was obtained with ORTEP software included in the WinGX package.<sup>iv</sup>

### X-ray diffraction data for *trans*-[PdCl<sub>2</sub>(MC<sub>1</sub>)<sub>2</sub>]*·*acetone

Crystals of good quality for X-ray diffraction were obtained by slow evaporation of a saturated solution of the complex in a mixture of acetone/*n*-hexane. The structure was solved by Direct methods. All non-hydrogen atoms were refined with anisotropic displacement thermal parameters. All hydrogen atoms were idealised and were positioned geometrically and refined using the riding model with U<sub>iso</sub>(H) = 1.2 U<sub>eq</sub>(C) for those attached to carbon and with U<sub>iso</sub>(H) = 1.2 U<sub>eq</sub>(O) for those of the OH group. The hydrogen atoms of the acetone molecule were also idealised and positioned geometrically but refined using the riding model with U<sub>iso</sub>(H) = 1.5 U<sub>eq</sub>(C). All the CF<sub>3</sub> groups were disordered over two different orientations. The following bond length and angle restraints (DFIX) were applied: C-F distance = 1.33(3); C<sub>ipso</sub>-F distance = 2.33 (4). Moreover, F-F distances of the disordered F atoms were restrained to be equal within sd of 0.03 (with SADI command) and the U<sub>ij</sub> were restrained with DELU and SIMU instructions. All disordered atoms were refined anisotropically and the sum of the site occupation factors was restrained to 1.000. CCDC deposition number 2097178

#### Crystal data *trans*-[PdCl<sub>2</sub>(MC<sub>1</sub>)<sub>2</sub>]*·*acetone

|                  |                                                                                  |            |             |
|------------------|----------------------------------------------------------------------------------|------------|-------------|
| Chemical formula | C <sub>45</sub> H <sub>32</sub> F <sub>12</sub> O <sub>5</sub> P <sub>2</sub> Pd | a          | 15.3938(7)  |
| Molecular weight | 1119.94                                                                          | b          | 15.6175(8)  |
| Space group      | Monoclinic, P 21/c                                                               | c          | 20.4211(10) |
| wavelength       | 0.71073 (Mo Kα)                                                                  | α          | 90          |
| Temperature      | 293(2) K                                                                         | β          | 97.1070(10) |
| Volume           | 4871.8(4) Å <sup>3</sup>                                                         | γ          | 90          |
| Z                | 4                                                                                | R[I>2σ(I)] | 0.0475      |
| S                | 1.029                                                                            | wR2        | 0.1288      |

X-ray diffraction data for *trans*-[PdCl<sub>2</sub>(MC2)<sub>2</sub>]

Crystals of good quality for X-ray diffraction were obtained by slow diffusion of n-hexane into a solution of the complex in CH<sub>2</sub>Cl<sub>2</sub>. The structure was solved by direct methods. All non-hydrogen atoms were refined with anisotropic displacement thermal parameters. All hydrogen atoms were idealised and were positioned geometrically and refined using the riding model with  $U_{\text{iso}}(\text{H}) = 1.2 U_{\text{eq}}(\text{C})$  for those attached to carbon and with  $U_{\text{iso}}(\text{H}) = 1.2 U_{\text{eq}}(\text{O})$  for those of the OH group. Two of the CF<sub>3</sub> groups were disordered over two different orientations with the F atoms defined anisotropically. The following bond length and angle restraints (DFIX) were applied: C-F distance = 1.33(1); C<sub>ipso</sub>-F distance = 2.33 (3). Moreover, F-F distances of the disordered F atoms were restrained to be equal within sd of 0.03 (with SADI command) and the sum of the site occupation factors was restrained to 1.000. The Uij were restrained with DELU and SIMU instructions. No restraints were imposed in the non-disordered CF<sub>3</sub> groups. Badly disordered solvent molecules were observed. The SQUEEZE instruction using PLATON<sup>v</sup> was tested with. no significant difference in bond distances and angles. (Parameters after SQUEEZE routine: R = 0.0703, wR2 = 0.1972, S = 0.986). CCDC deposition number 2106238.

*Crystal data* *trans*-[PdCl<sub>2</sub>(MC2)<sub>2</sub>]

|                  |                                                                                  |                     |             |
|------------------|----------------------------------------------------------------------------------|---------------------|-------------|
| Chemical formula | C <sub>42</sub> H <sub>26</sub> F <sub>12</sub> O <sub>4</sub> P <sub>2</sub> Pd | a                   | 10.1026(5)  |
| Molecular weight | 1061.87                                                                          | b                   | 27.1594(13) |
| Space group      | Orthorhombic, P bca                                                              | c                   | 36.7299(17) |
| wavelength       | 0.71073 (Mo K $\alpha$ )                                                         | $\alpha$            | 90          |
| Temperature      | 293(2) K                                                                         | $\beta$             | 90          |
| Volume           | 10078.0(8) Å <sup>3</sup>                                                        | $\gamma$            | 90          |
| Z                | 8                                                                                | R[I>2 $\sigma$ (I)] | 0.0832      |
| S                | 1.028                                                                            | wR2                 | 0.2908      |



# NMR spectra of phosphine compounds and derivatives

MC1

$^1\text{H}$  (400.13 MHz,  $\text{CDCl}_3$ )

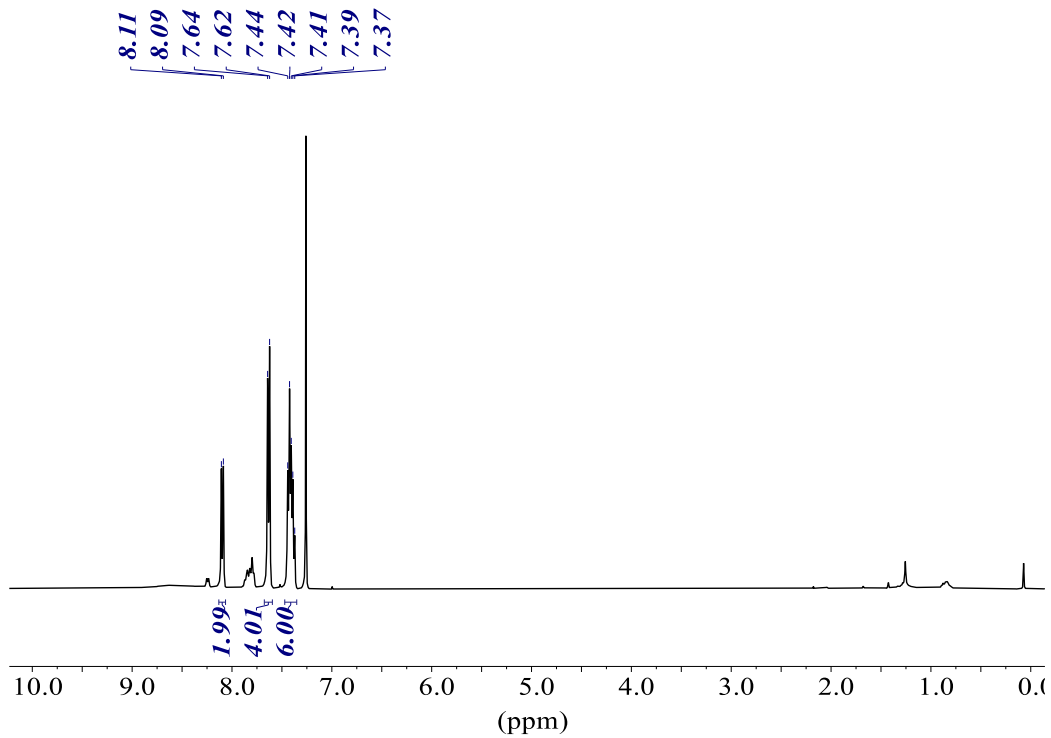

$^{13}\text{C}\{^1\text{H}\}$  (100.61 MHz,  $\text{CDCl}_3$ )

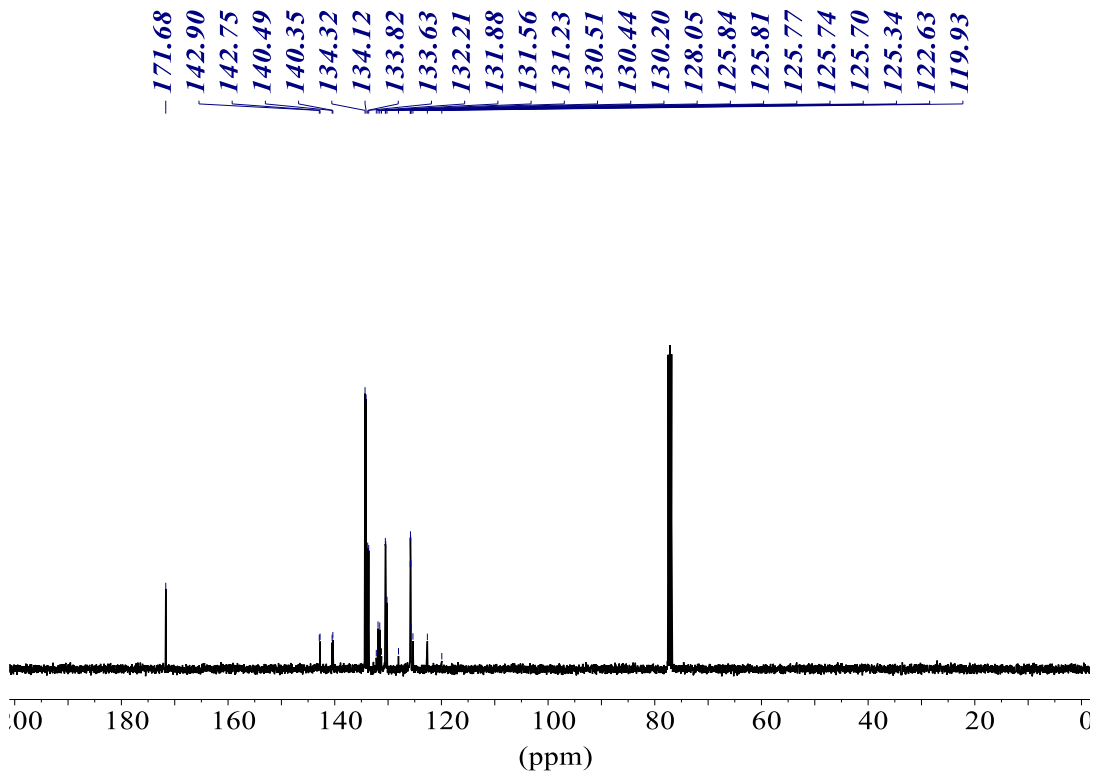

$^{31}\text{P}\{^1\text{H}\}$  (101.27 MHz,  $\text{CDCl}_3$ )

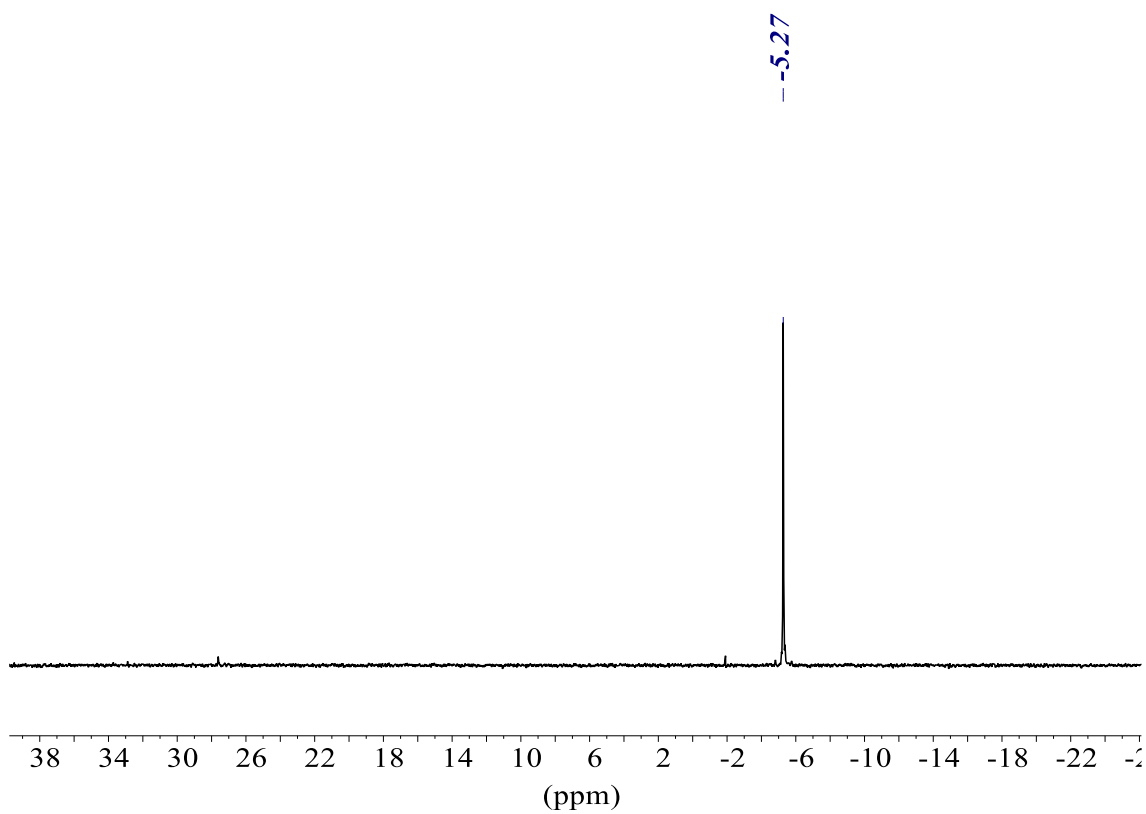

$^{19}\text{F}\{^1\text{H}\}$  (376.50 MHz,  $\text{CDCl}_3$ )

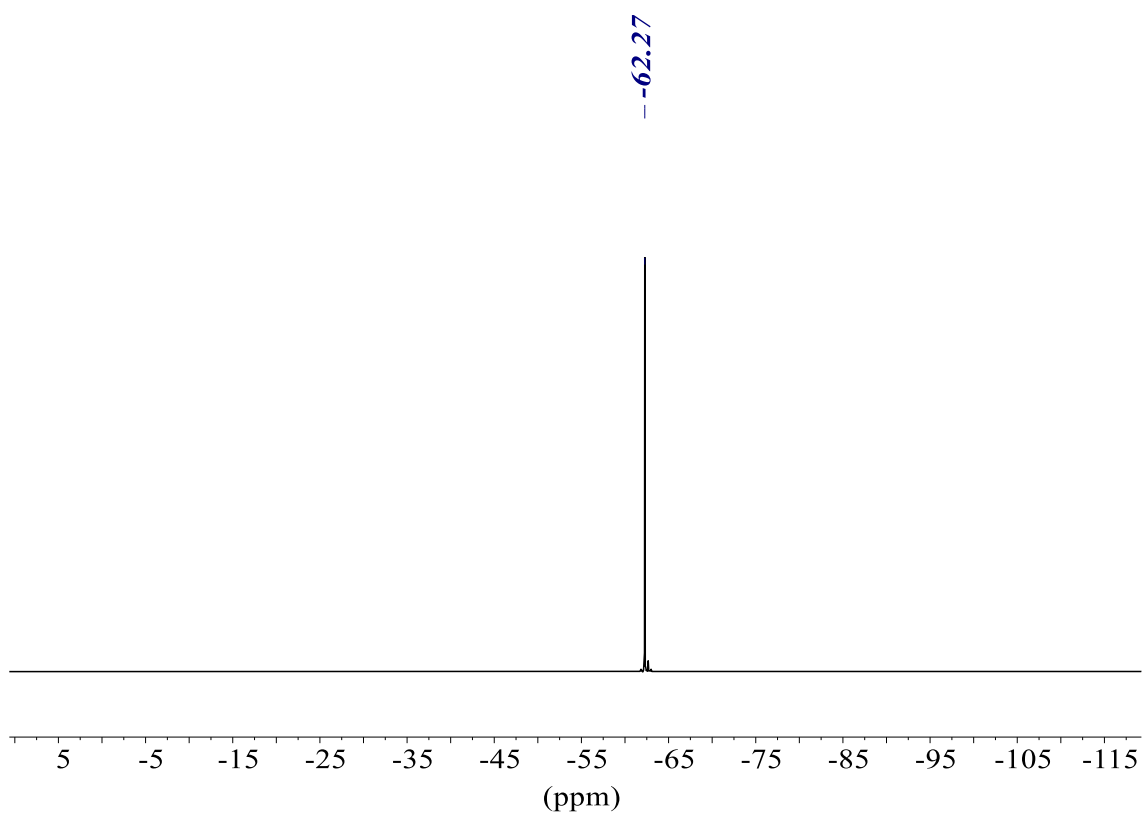

### HR-MS (ESI<sup>-</sup> $m/z$ ) [M-H]<sup>-</sup>

calculated for [C<sub>21</sub>H<sub>12</sub>F<sub>6</sub>O<sub>2</sub>P]<sup>-</sup>

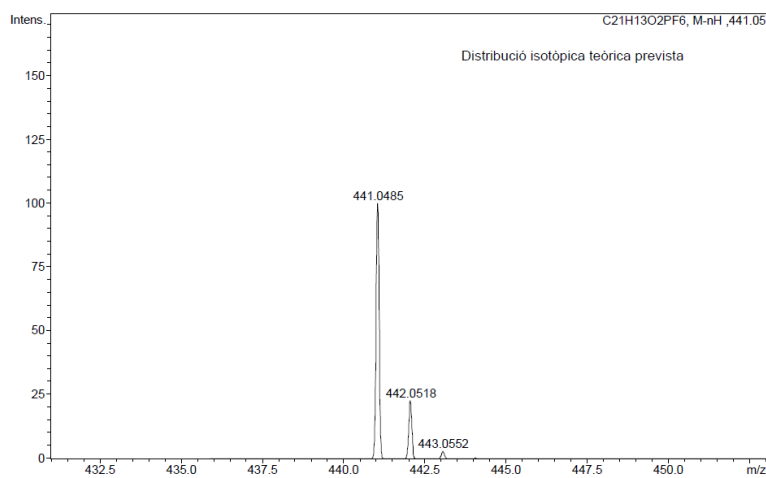

| # | $m/z$    | I   | I%    |
|---|----------|-----|-------|
| 1 | 441.0485 | 100 | 100.0 |
| 2 | 442.0518 | 23  | 22.9  |
| 3 | 443.0552 | 3   | 2.9   |

found

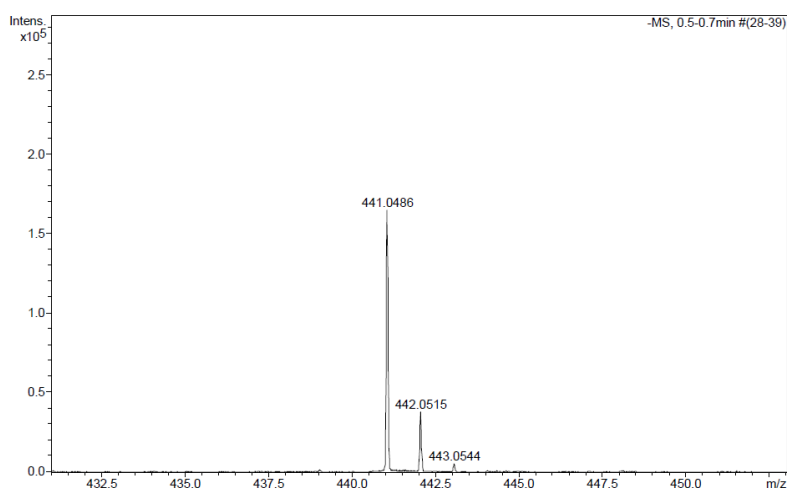

| # | $m/z$    | I      | I%    |
|---|----------|--------|-------|
| 1 | 441.0486 | 164644 | 100.0 |
| 2 | 442.0515 | 37951  | 23.1  |
| 3 | 443.0544 | 5198   | 3.2   |

DC1

$^1\text{H}$  (400.13 MHz,  $\text{CD}_3\text{OD}$ )

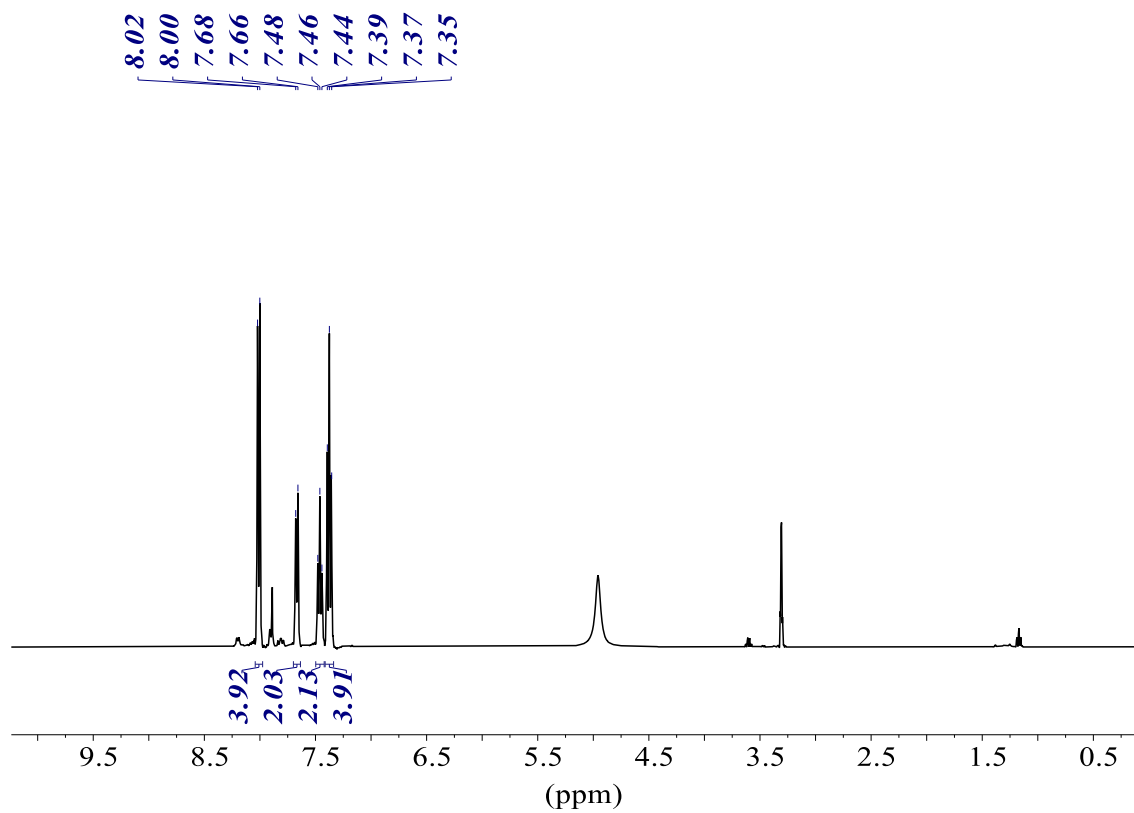

$^{13}\text{C}\{^1\text{H}\}$  (100.61 MHz,  $\text{CD}_3\text{OD}$ )

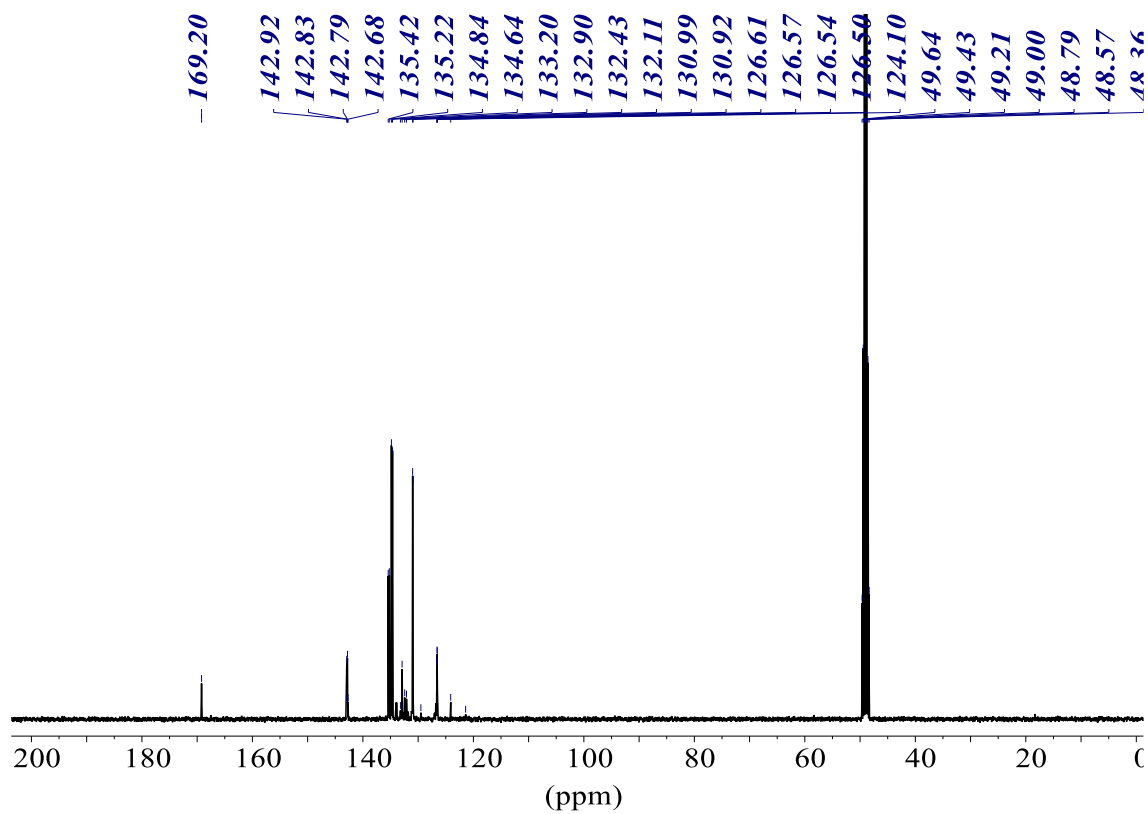

$^{31}\text{P}\{^1\text{H}\}$  (101.27 MHz,  $\text{CD}_3\text{OD}$ )

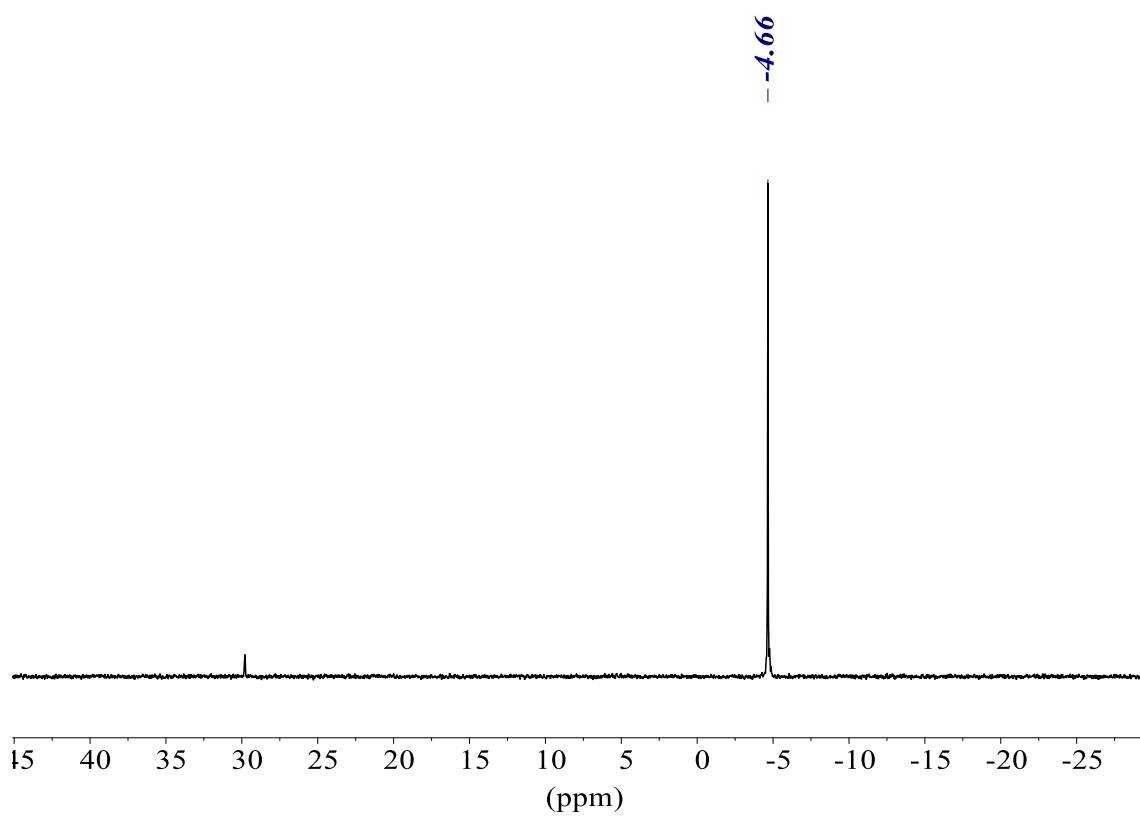

$^{19}\text{F}\{^1\text{H}\}$  (235.39 MHz,  $\text{CD}_3\text{OD}$ )

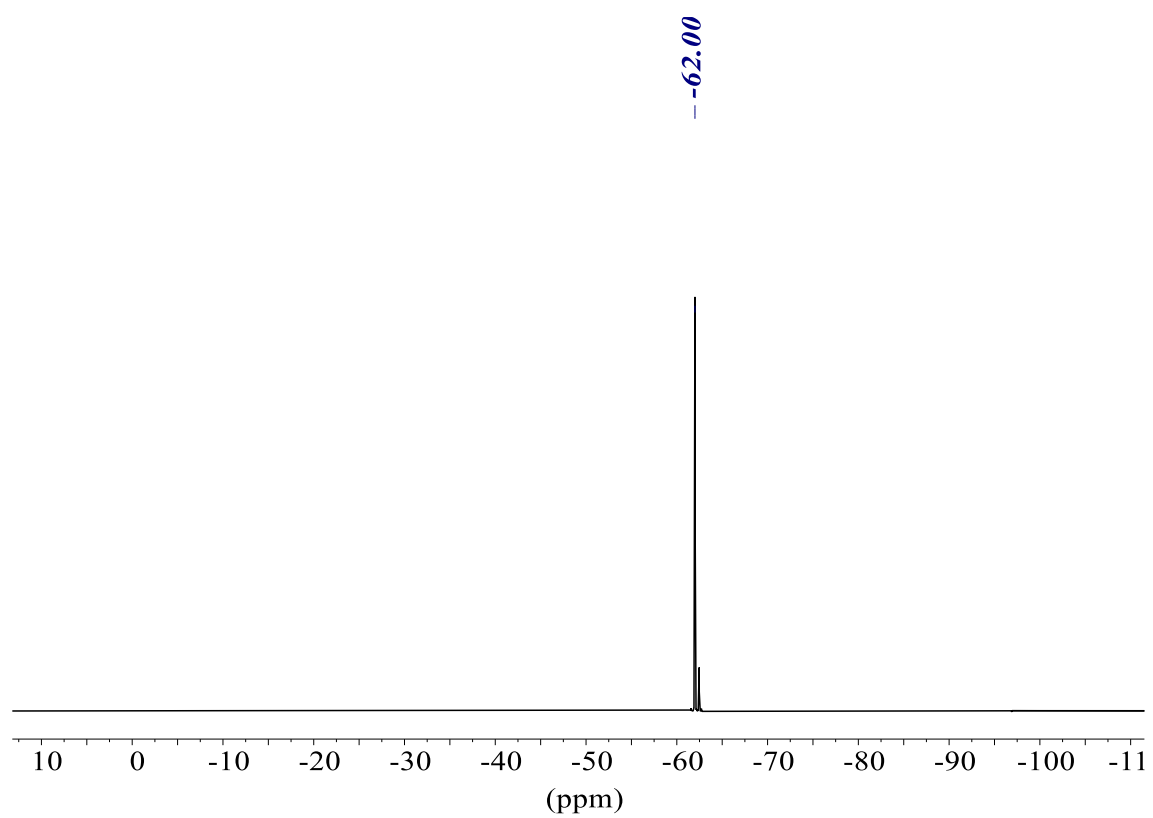

# HR-MS (ESI $m/z$ ) $[M-H]^-$

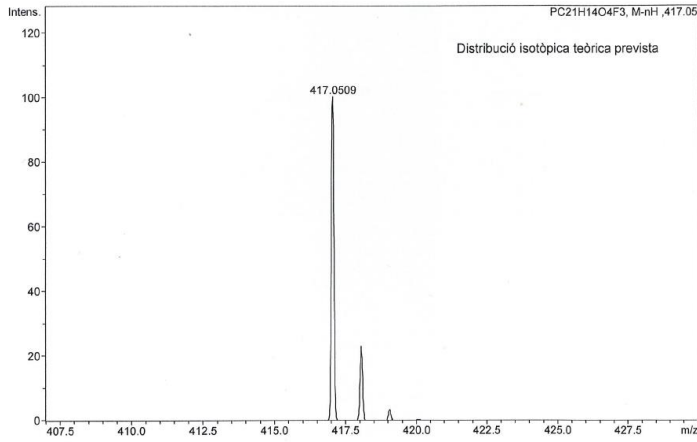

| # | m/z      | I   | I%    |
|---|----------|-----|-------|
| 1 | 417.0509 | 100 | 100.0 |
| 2 | 418.0543 | 23  | 23.0  |
| 3 | 419.0576 | 3   | 3.3   |

found

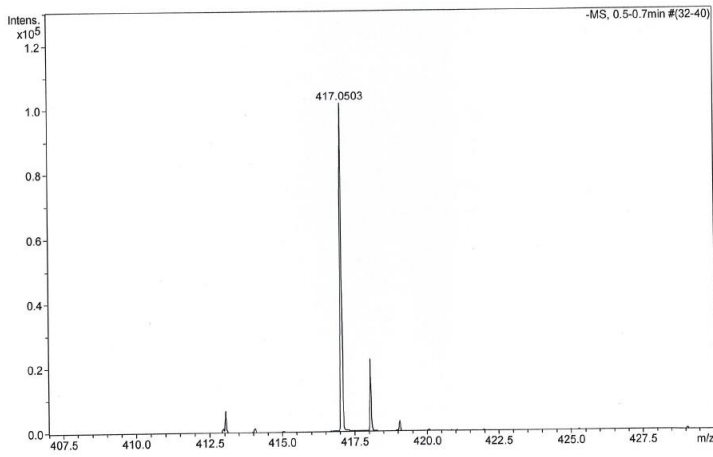

| # | m/z      | I      | I%    |
|---|----------|--------|-------|
| 1 | 417.0503 | 101686 | 100.0 |
| 2 | 418.0529 | 22379  | 22.0  |
| 3 | 419.0556 | 3231   | 3.2   |

MC2

$^1\text{H}$  (400.13 MHz,  $\text{CDCl}_3$ )

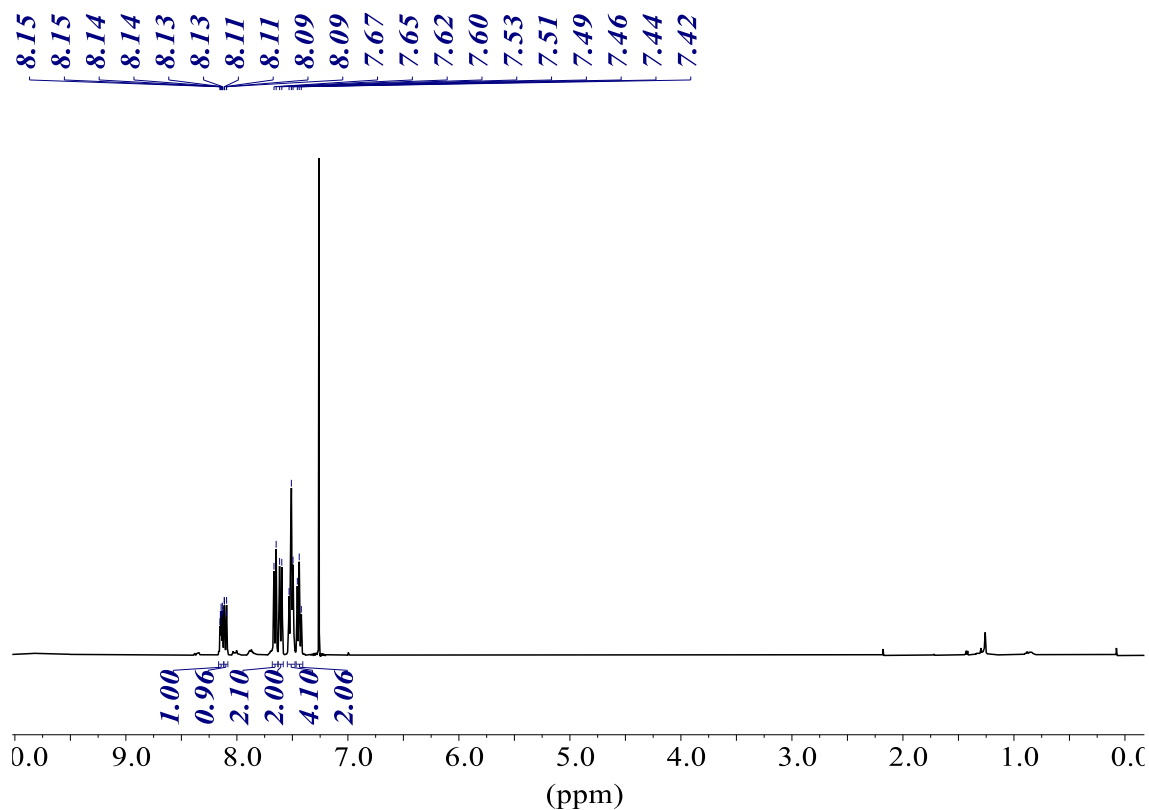

$^{13}\text{C}\{^1\text{H}\}$  (100.61 MHz,  $\text{CDCl}_3$ )

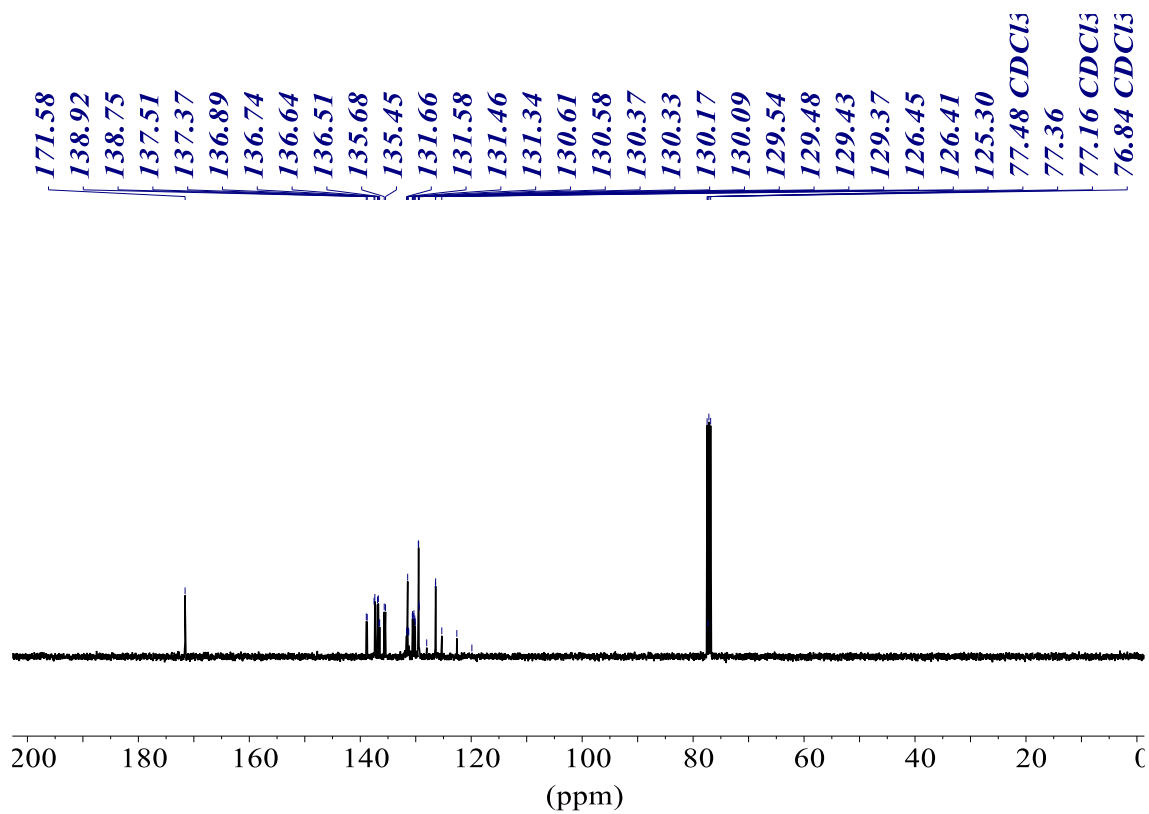

$^{31}\text{P}\{^1\text{H}\}$  (101.27 MHz,  $\text{CDCl}_3$ )

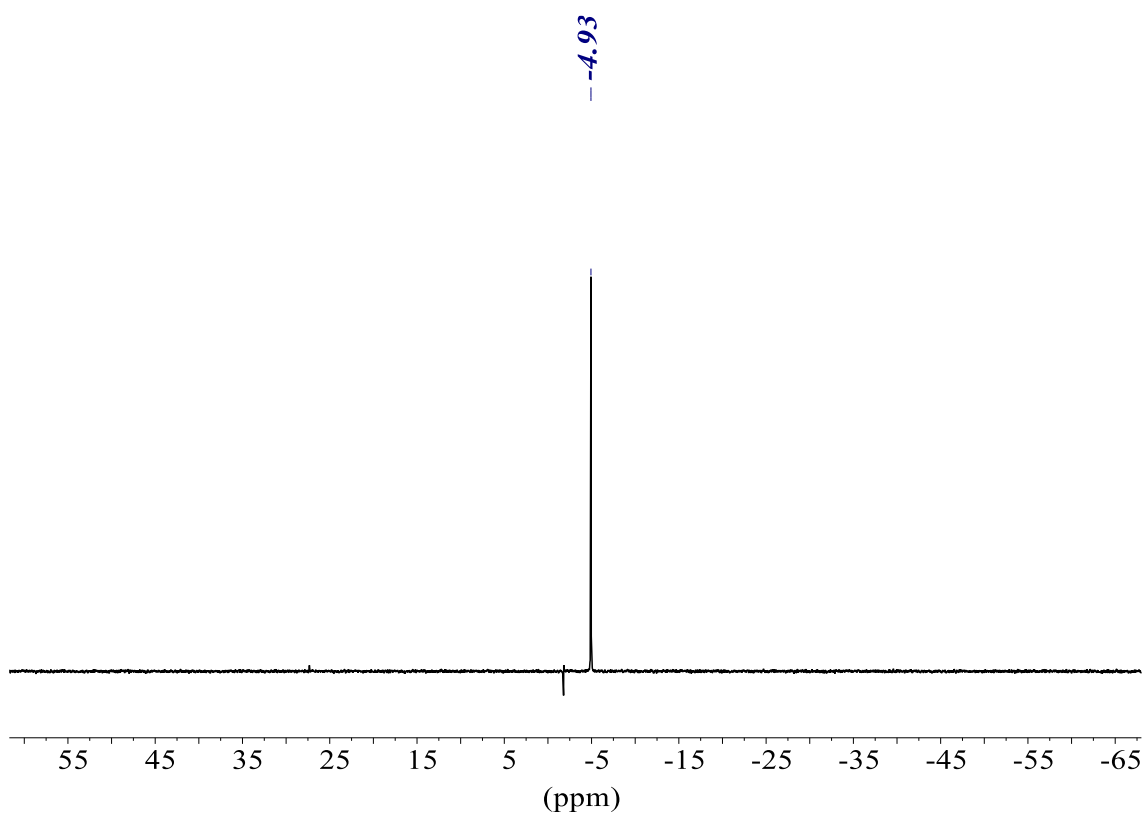

$^{19}\text{F}\{^1\text{H}\}$  (235.39 MHz,  $\text{CDCl}_3$ )

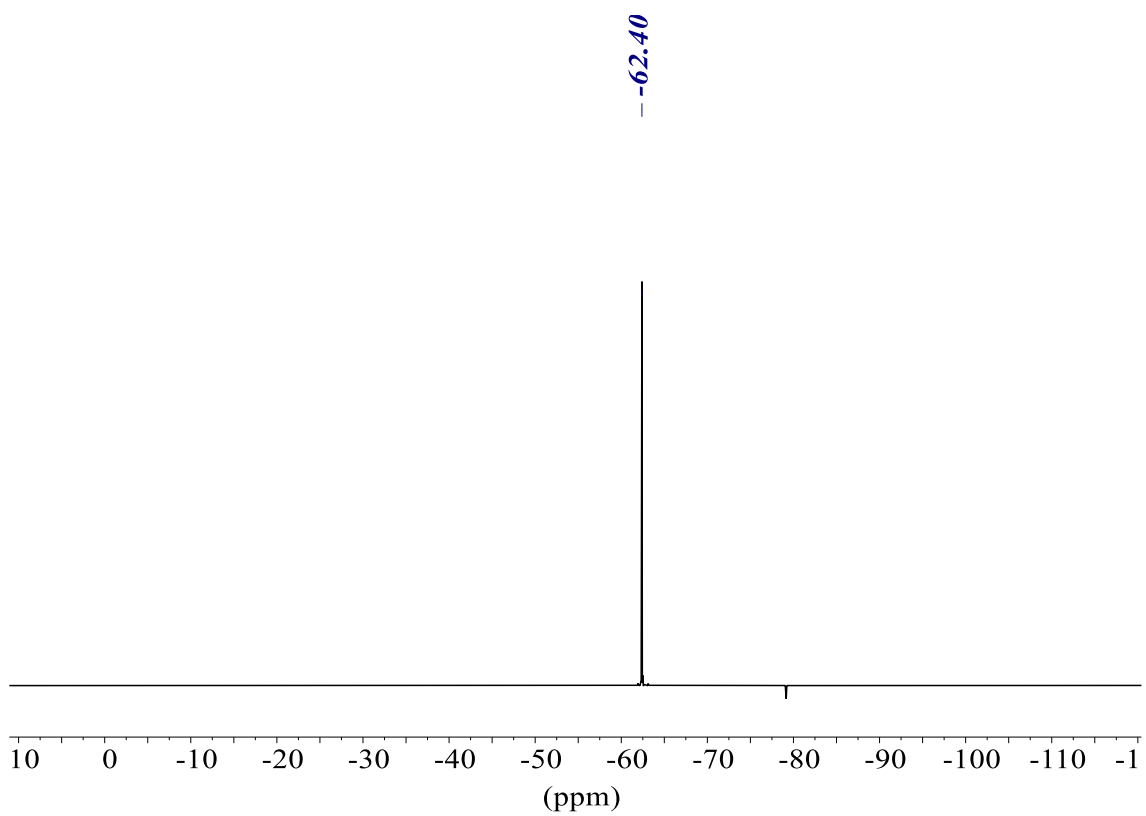



### HR-MS (ESI<sup>-</sup> $m/z$ ) [M-H]<sup>-</sup>

calculated for [C<sub>21</sub>H<sub>12</sub>F<sub>6</sub>O<sub>2</sub>P]<sup>-</sup>

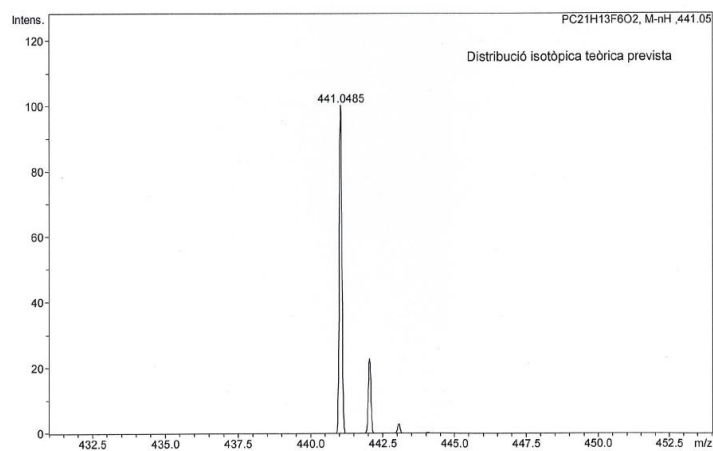

| # | m/z      | I   | I%    |
|---|----------|-----|-------|
| 1 | 441.0485 | 100 | 100.0 |
| 2 | 442.0518 | 23  | 22.9  |
| 3 | 443.0552 | 3   | 2.9   |

found

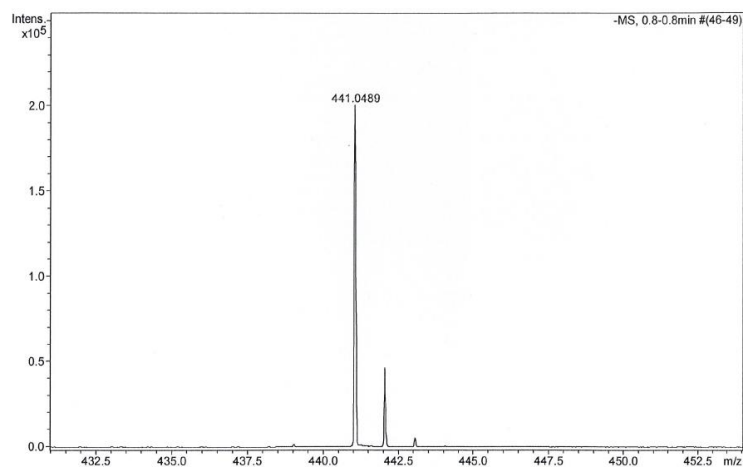

| # | m/z      | I      | I%    |
|---|----------|--------|-------|
| 1 | 441.0489 | 200125 | 100.0 |
| 2 | 442.0512 | 46380  | 23.2  |
| 3 | 443.0547 | 5585   | 2.8   |

DC2

$^1\text{H}$  (400.13 MHz,  $\text{CD}_3\text{OD}$ )

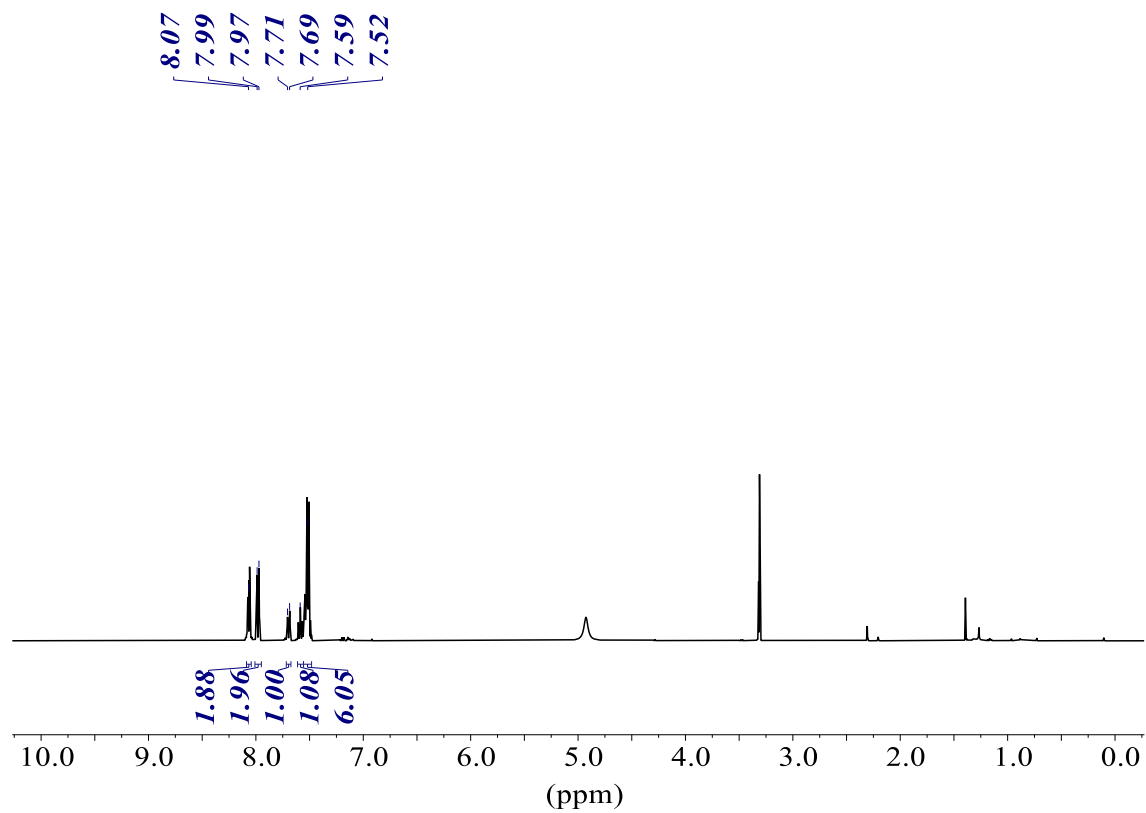

$^{13}\text{C}\{^1\text{H}\}$  (100.61 MHz,  $\text{CD}_3\text{OD}$ )

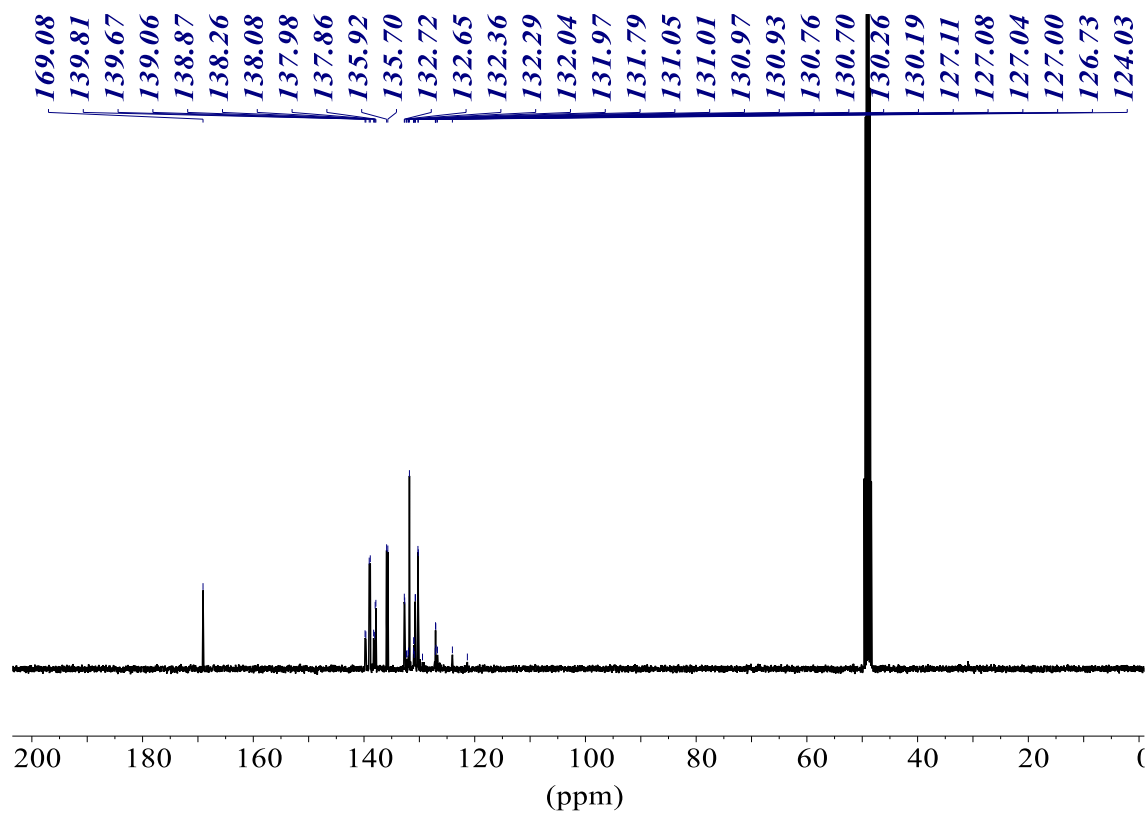

$^{31}\text{P}\{^1\text{H}\}$  (161.98 MHz  $\text{CD}_3\text{OD}$ )

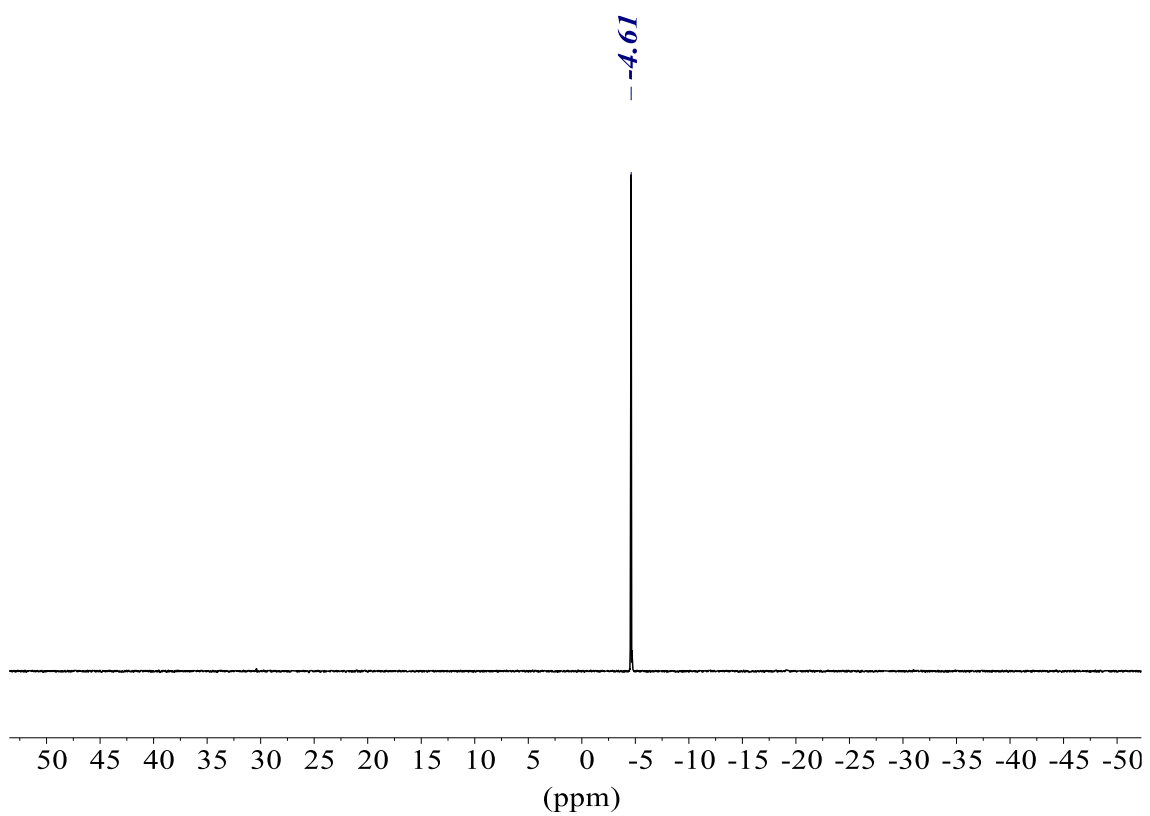

$^{19}\text{F}\{^1\text{H}\}$  (376.50 MHz,  $\text{CD}_3\text{OD}$ )

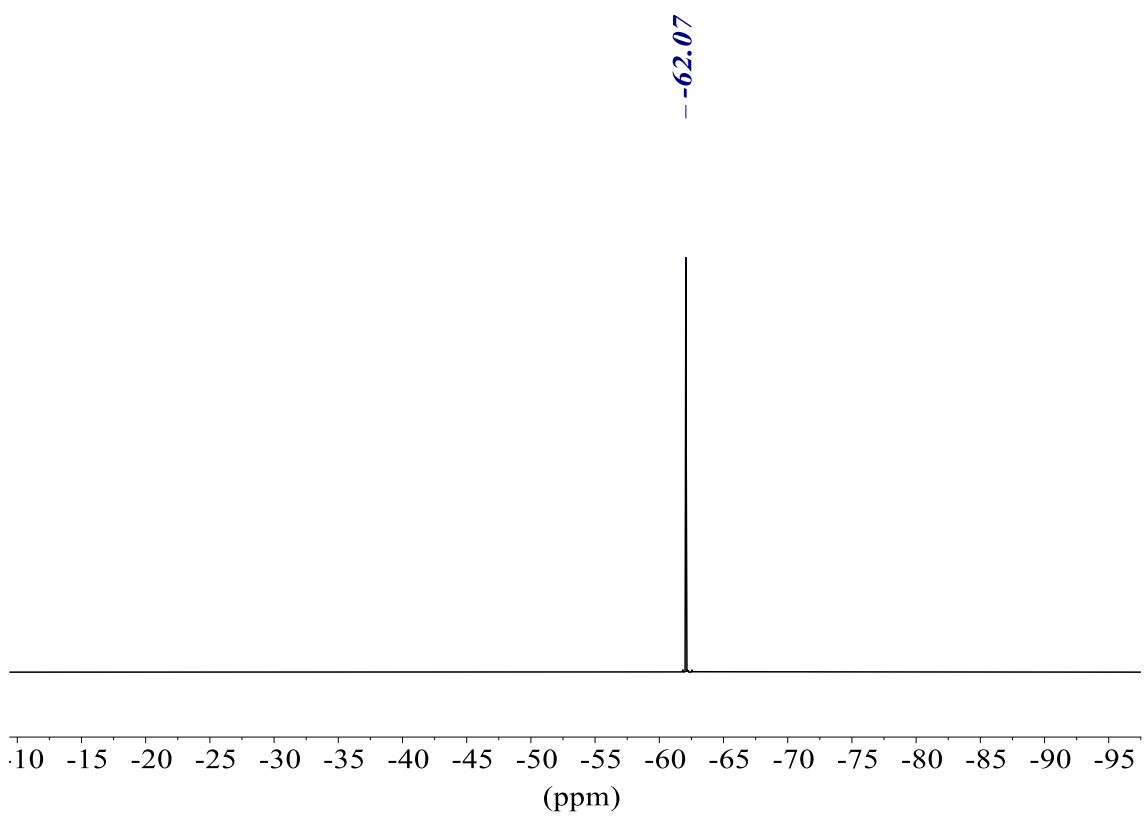

**HR-MS (ESI<sup>-</sup> m/z) [M-H]<sup>-</sup>**  
calculated for [C<sub>21</sub>H<sub>13</sub>F<sub>3</sub>O<sub>4</sub>P]<sup>-</sup>

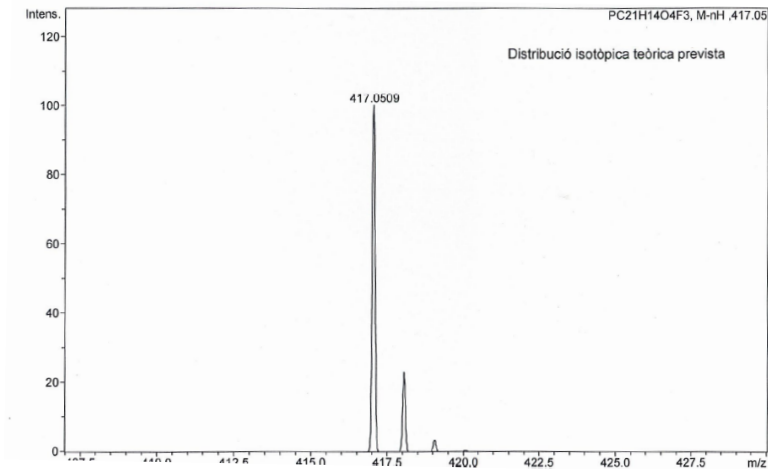

| # | m/z      | I   | I%    |
|---|----------|-----|-------|
| 1 | 417.0509 | 100 | 100.0 |
| 2 | 418.0543 | 23  | 23.0  |
| 3 | 419.0576 | 3   | 3.3   |

found

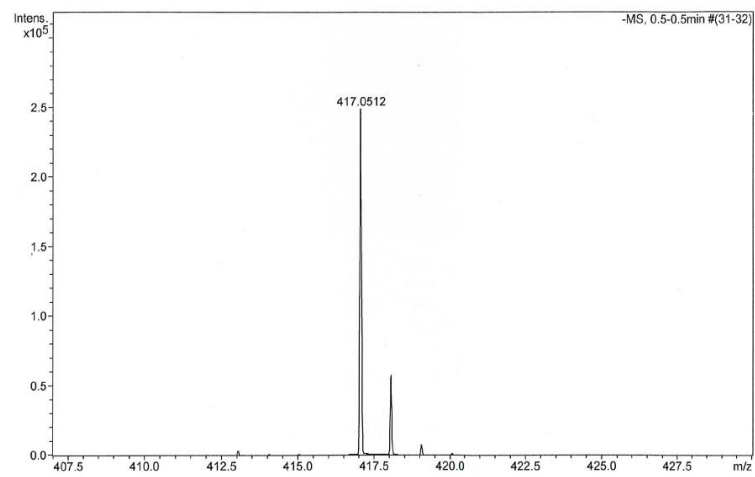

| # | m/z      | I      | I%    |
|---|----------|--------|-------|
| 1 | 417.0512 | 248910 | 100.0 |
| 2 | 418.0537 | 57557  | 23.1  |
| 3 | 419.0555 | 7600   | 3.1   |

TC2

$^1\text{H}$  (400.13 MHz,  $\text{CD}_3\text{OD}$ )

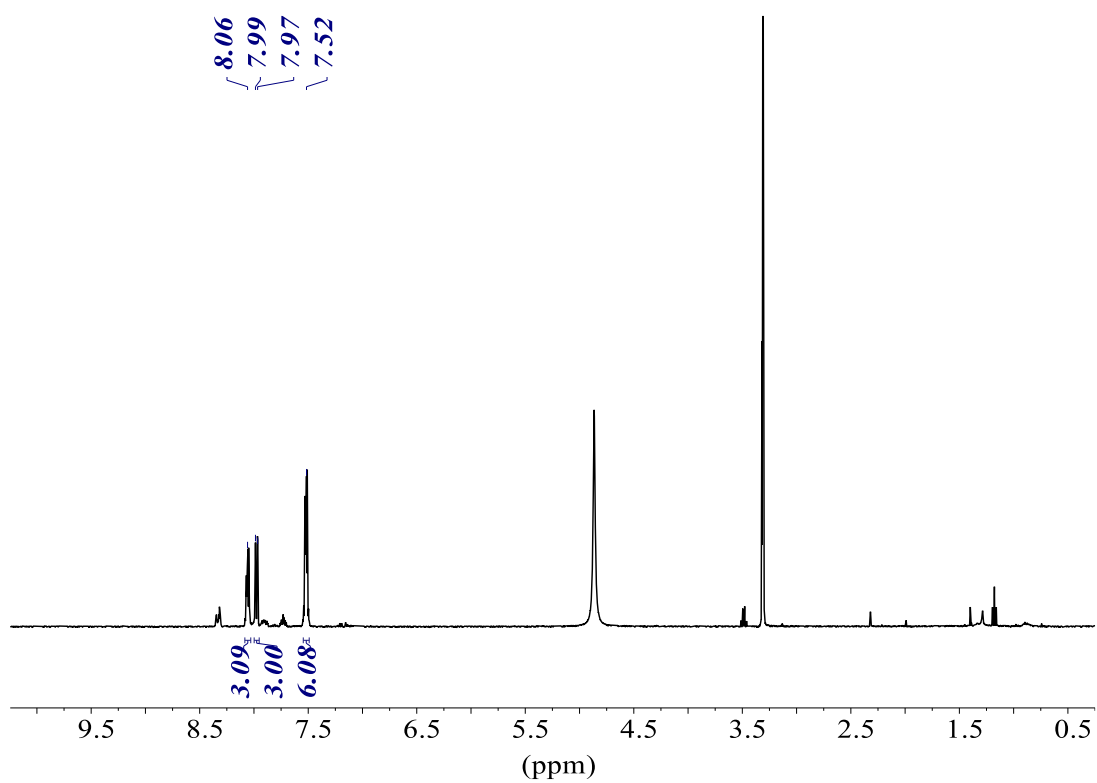

$^{13}\text{C}\{^1\text{H}\}$  (100.61 MHz,  $\text{CD}_3\text{OD}$ )

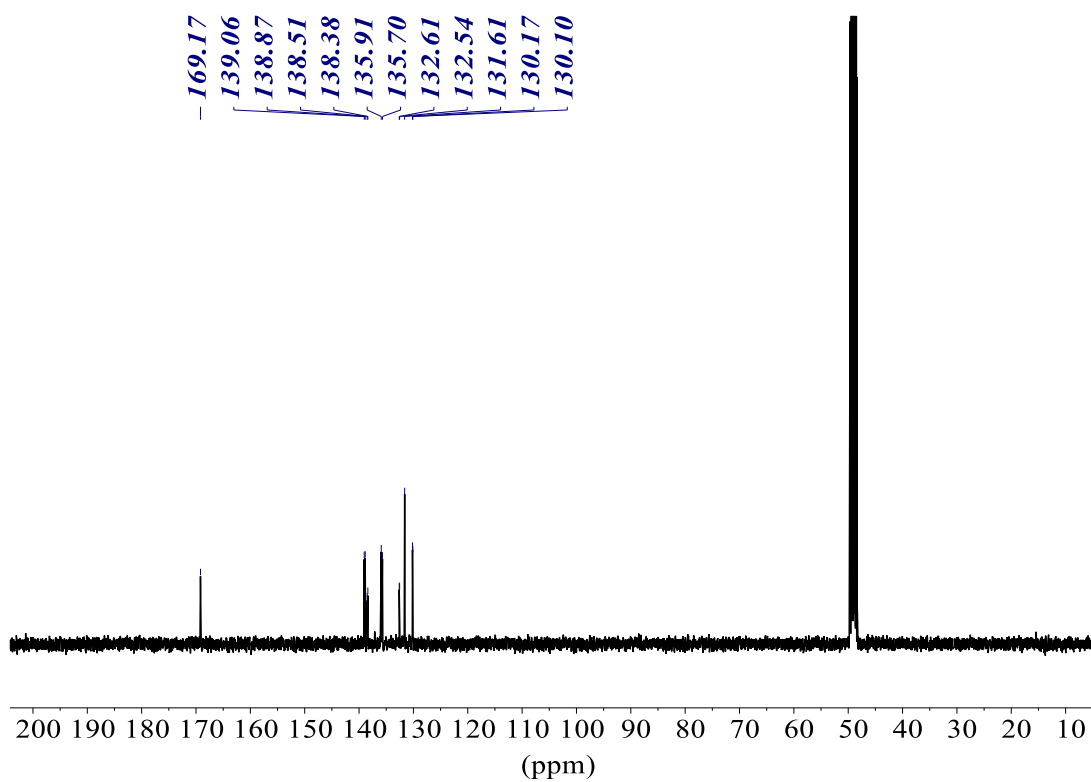

$^{31}\text{P}\{^1\text{H}\}$  (101.27 MHz  $\text{CD}_3\text{OD}$ )

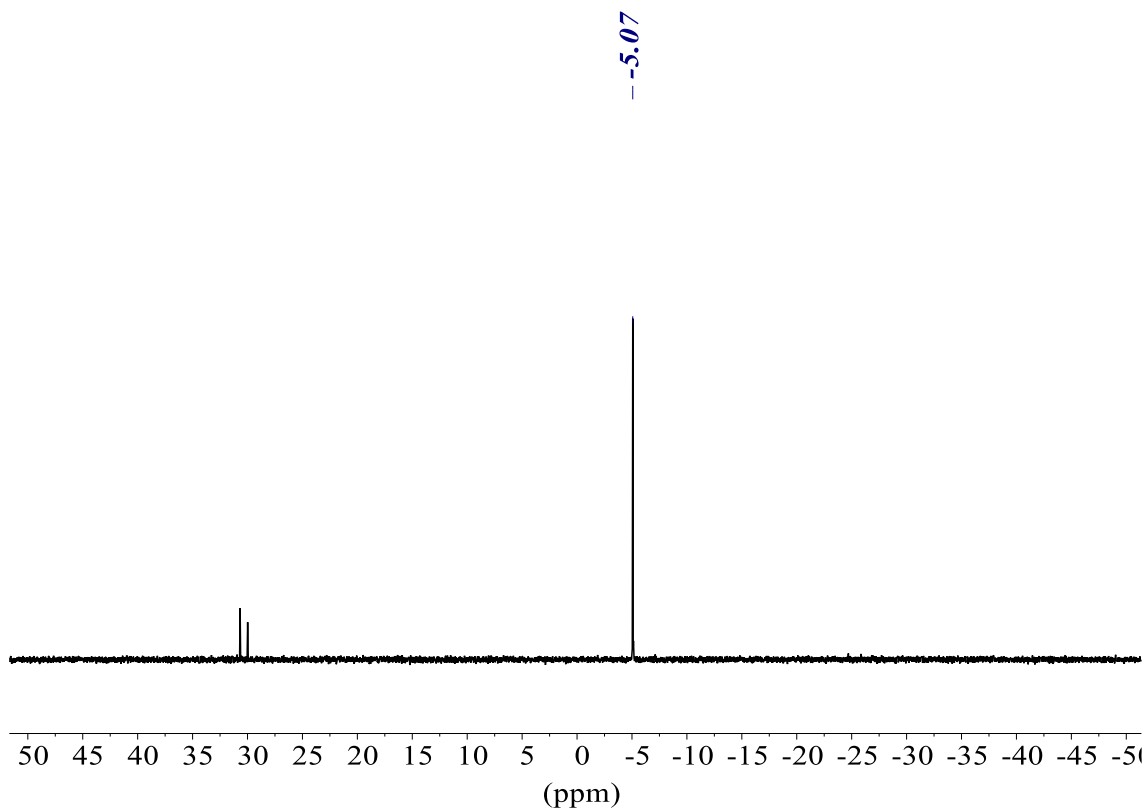

HR-MS (ESI<sup>-</sup>  $m/z$ )  $[\text{M}-\text{H}]^-$   
calculated for  $[\text{C}_{21}\text{H}_{14}\text{O}_6\text{P}]^-$

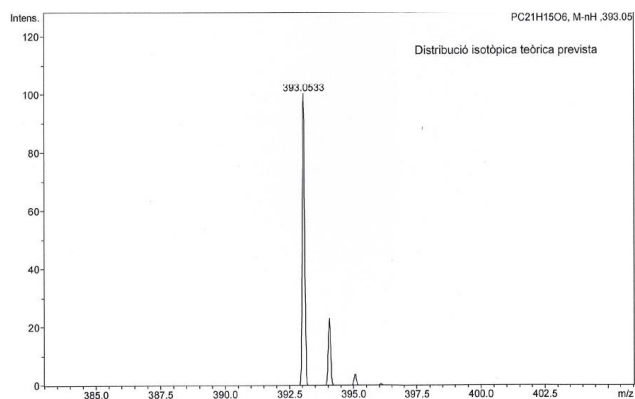

| # | $m/z$    | I   | I %   |
|---|----------|-----|-------|
| 1 | 393.0533 | 100 | 100.0 |
| 2 | 394.0567 | 23  | 23.1  |
| 3 | 395.0600 | 4   | 3.8   |

found

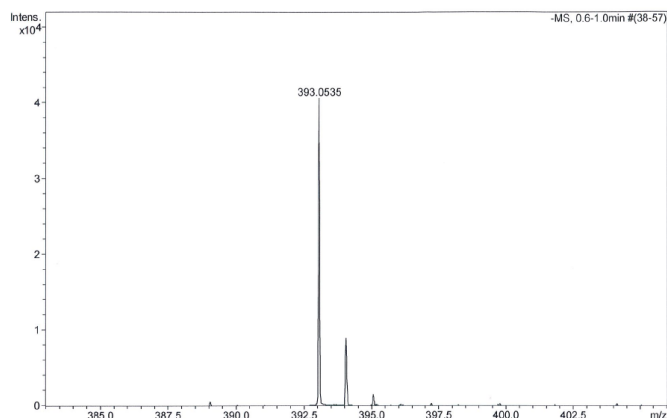

| # | $m/z$    | I     | I %   |
|---|----------|-------|-------|
| 1 | 393.0535 | 40578 | 100.0 |
| 2 | 394.0559 | 8988  | 22.2  |
| 3 | 395.0589 | 1474  | 3.6   |

MC4

$^1\text{H}$  (400.13 MHz,  $\text{CDCl}_3$ )

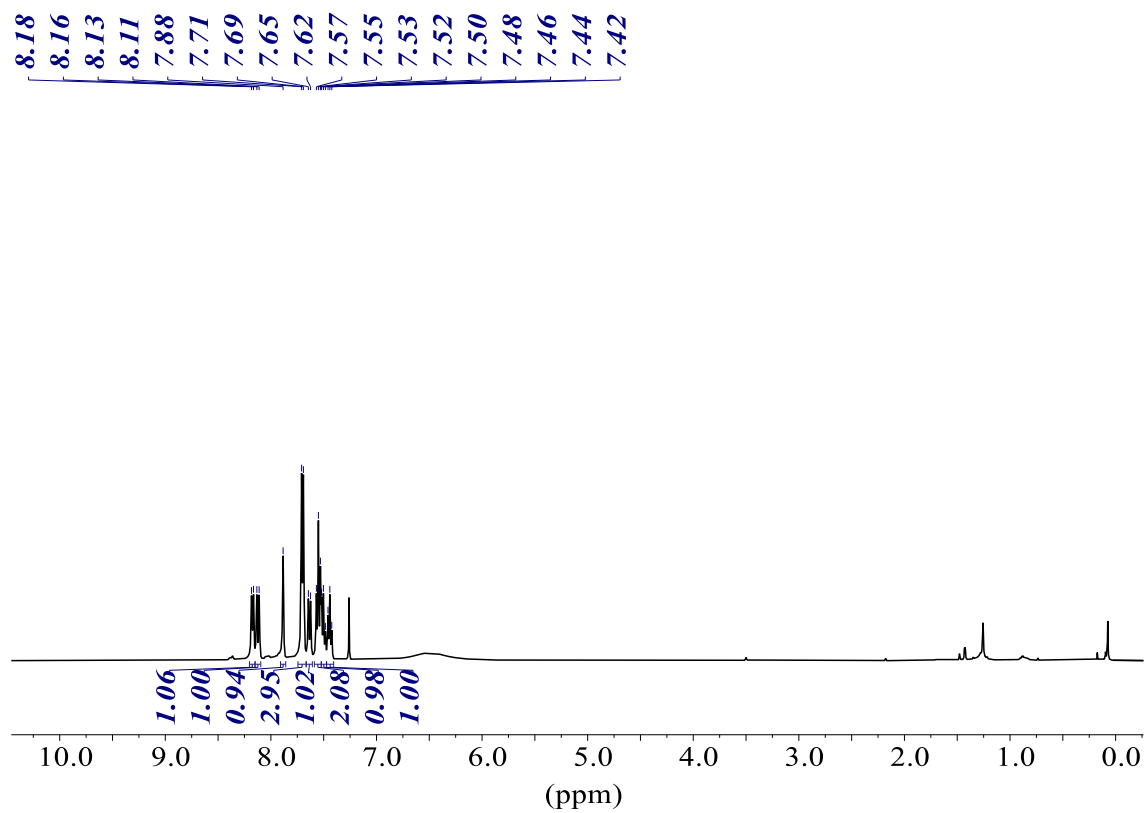

$^{13}\text{C}\{^1\text{H}\}$  (100.61 MHz,  $\text{CDCl}_3$ )

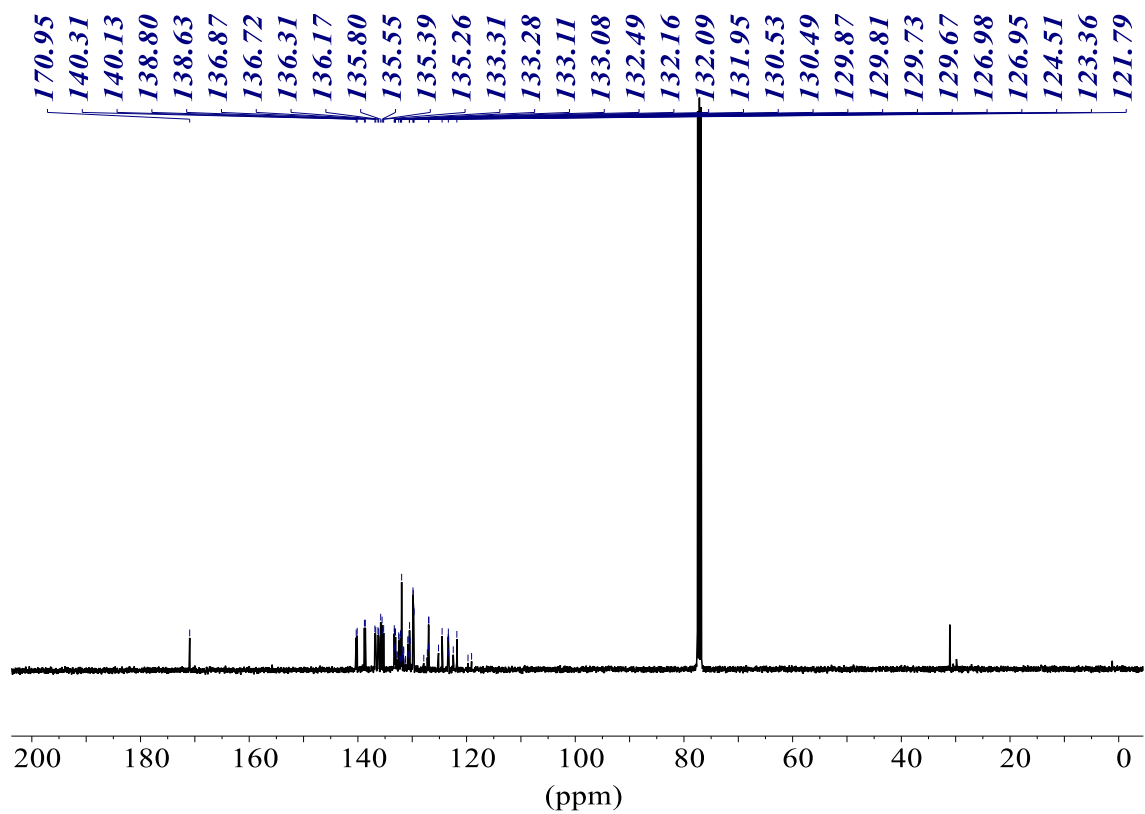

$^{31}\text{P}\{^1\text{H}\}$  (161.98 MHz,  $\text{CDCl}_3$ )

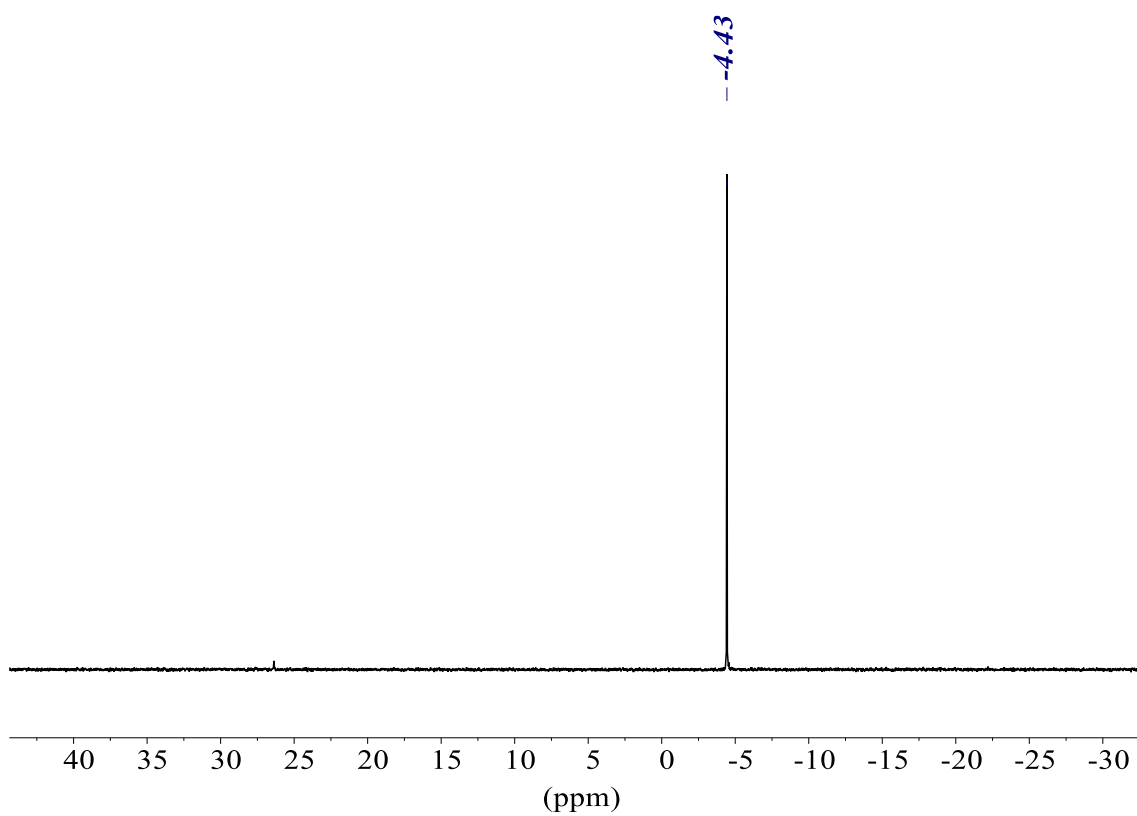

$^{19}\text{F}\{^1\text{H}\}$  (376.50 MHz,  $\text{CDCl}_3$ )

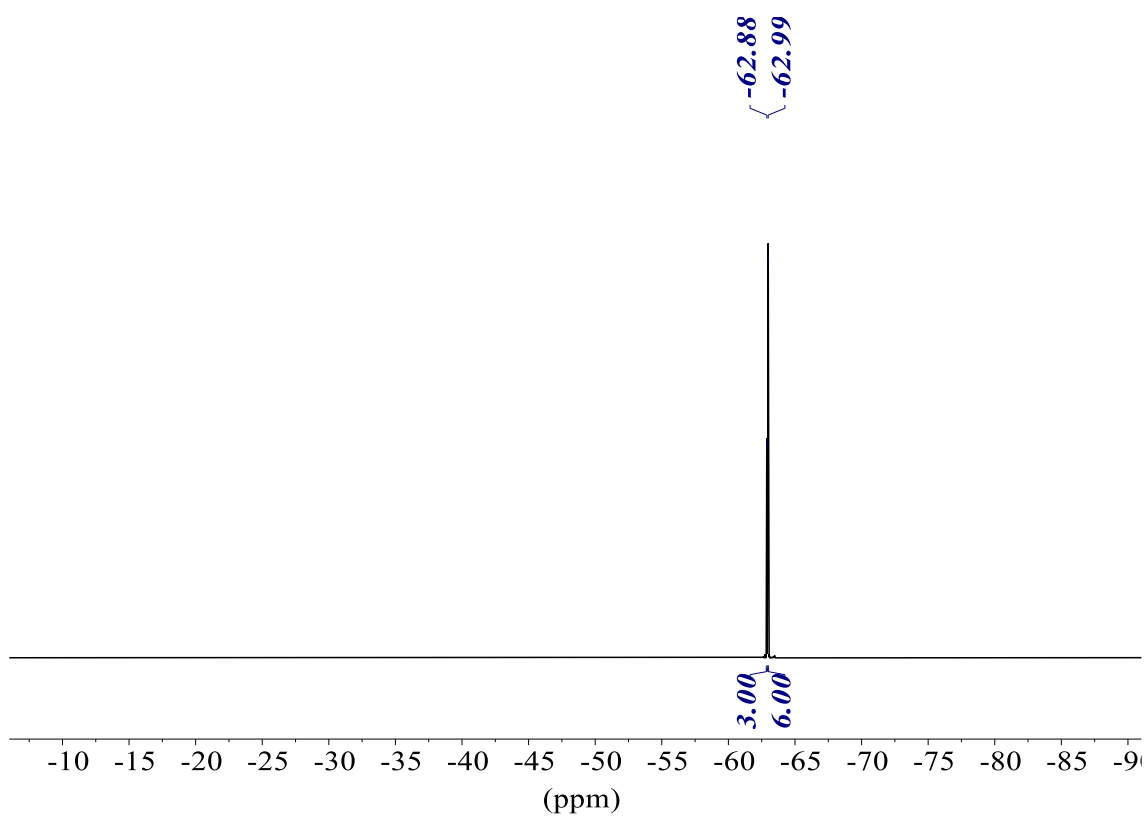



**HR-MS (ESI<sup>-</sup> m/z) [M-H]<sup>-</sup>**  
calculated for [C<sub>22</sub>H<sub>11</sub>F<sub>9</sub>O<sub>2</sub>P]<sup>-</sup>

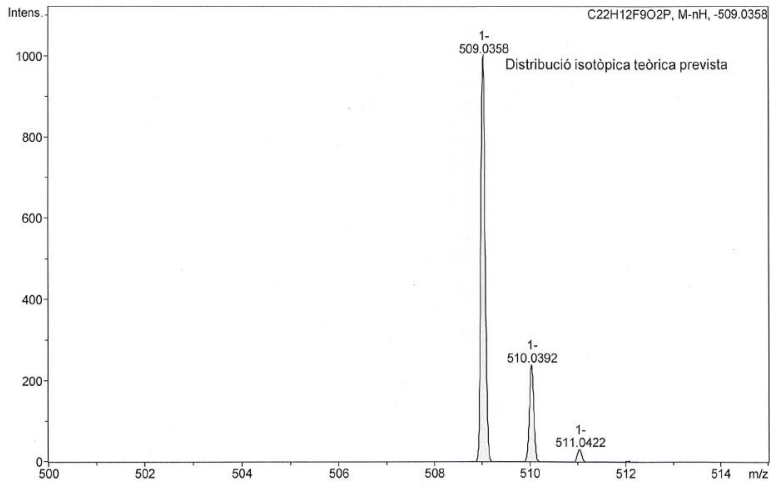

| # | m/z      | I    | I%    |
|---|----------|------|-------|
| 1 | 509.0358 | 1000 | 100.0 |
| 2 | 510.0392 | 239  | 23.9  |
| 3 | 511.0422 | 31   | 3.1   |

**found**

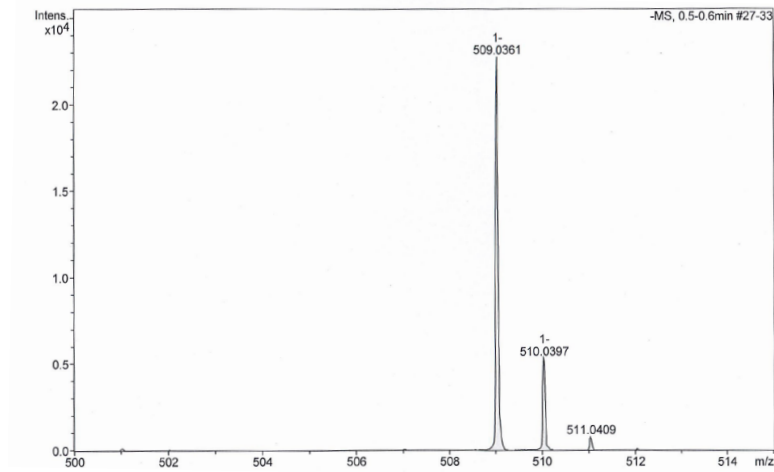

| # | m/z      | I     | I%    |
|---|----------|-------|-------|
| 1 | 509.0361 | 22740 | 100.0 |
| 2 | 510.0397 | 5340  | 23.5  |
| 3 | 511.0409 | 805   | 3.5   |

DC4

$^1\text{H}$  (400.13 MHz, acetone- $d_6$ )

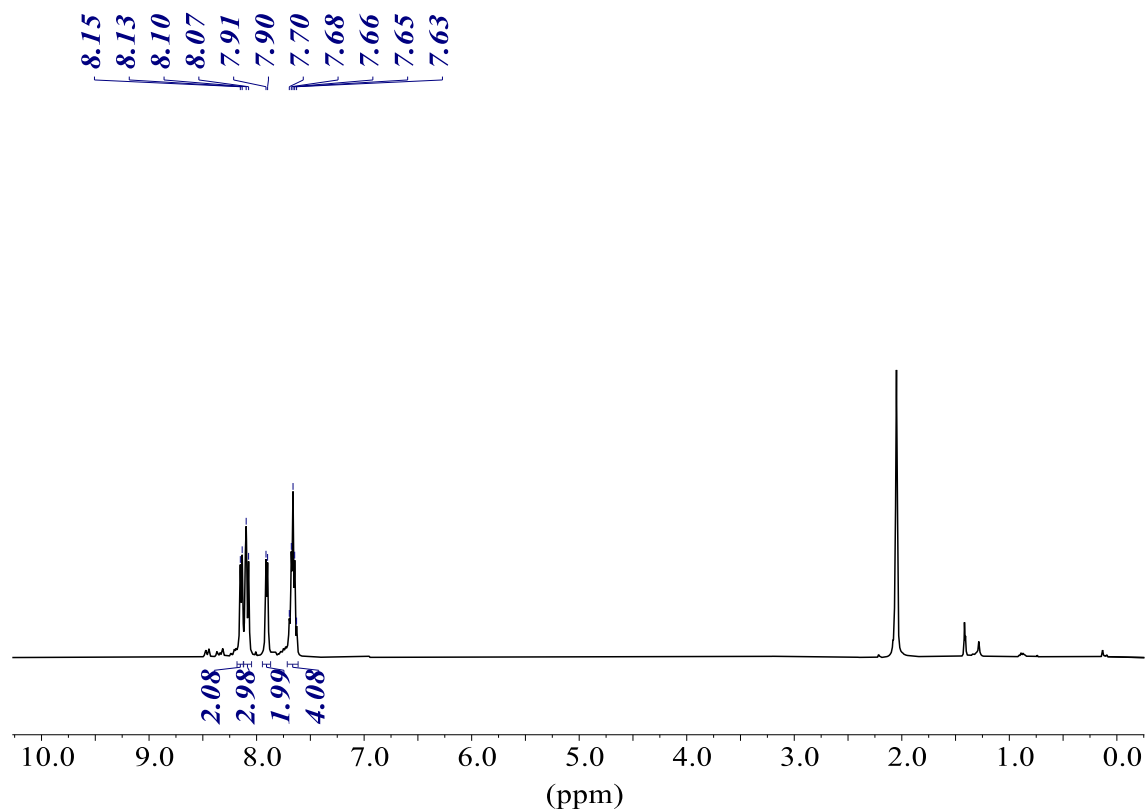

$^{13}\text{C}\{^1\text{H}\}$  (100.61 MHz, acetone- $d_6$ )

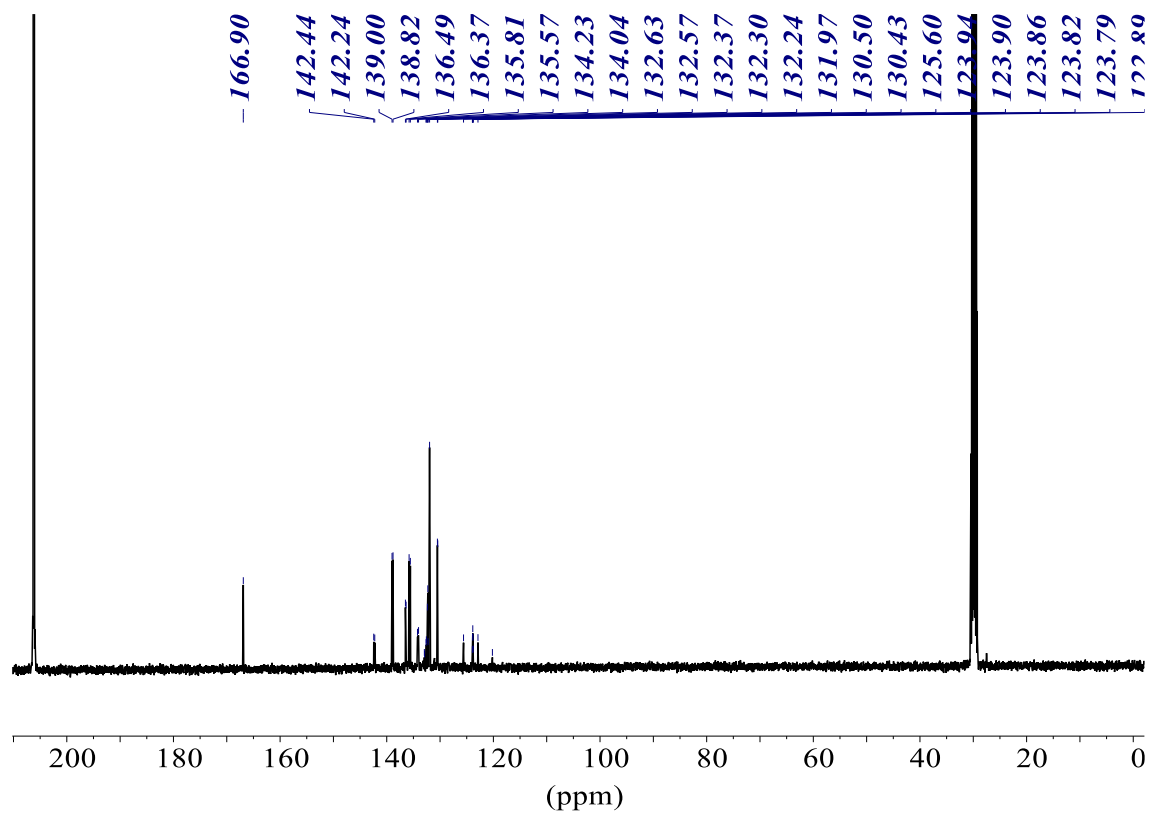

$^{31}\text{P}\{^1\text{H}\}$  (161.98 MHz, acetone-*d*<sub>6</sub>)

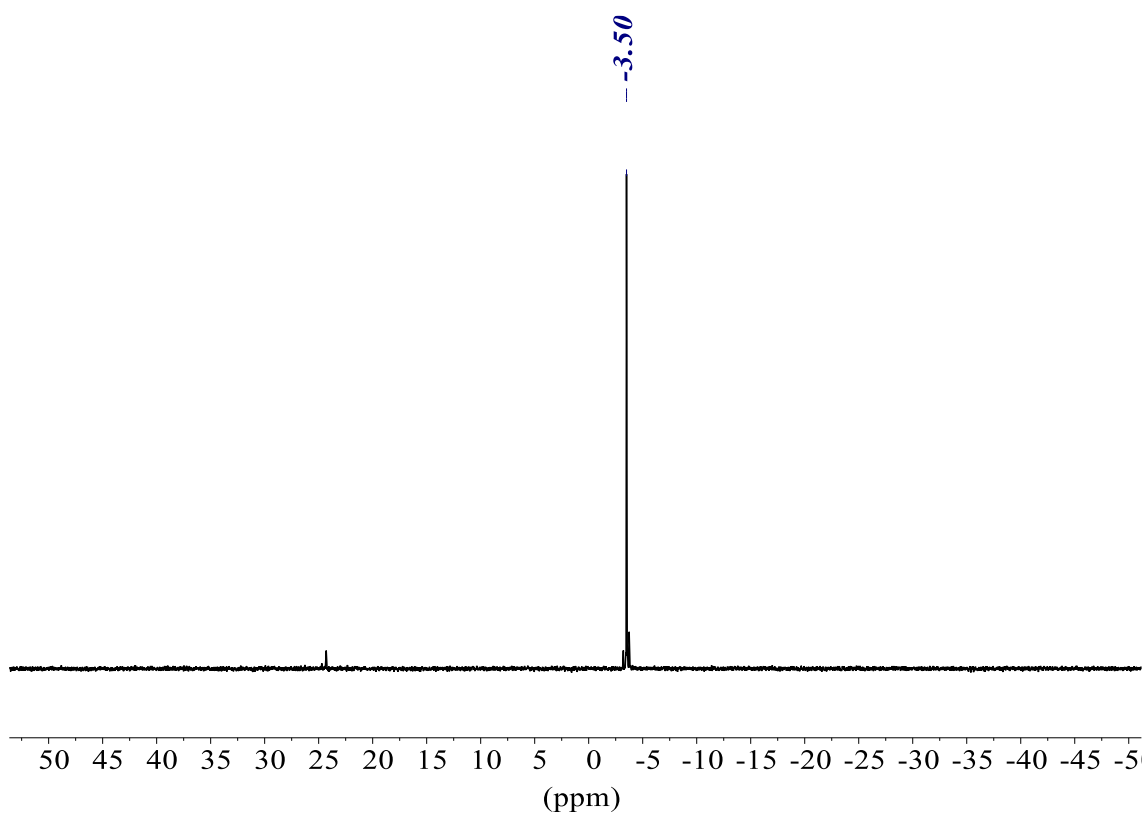

$^{19}\text{F}\{^1\text{H}\}$  (376.50 MHz, acetone-*d*<sub>6</sub>)

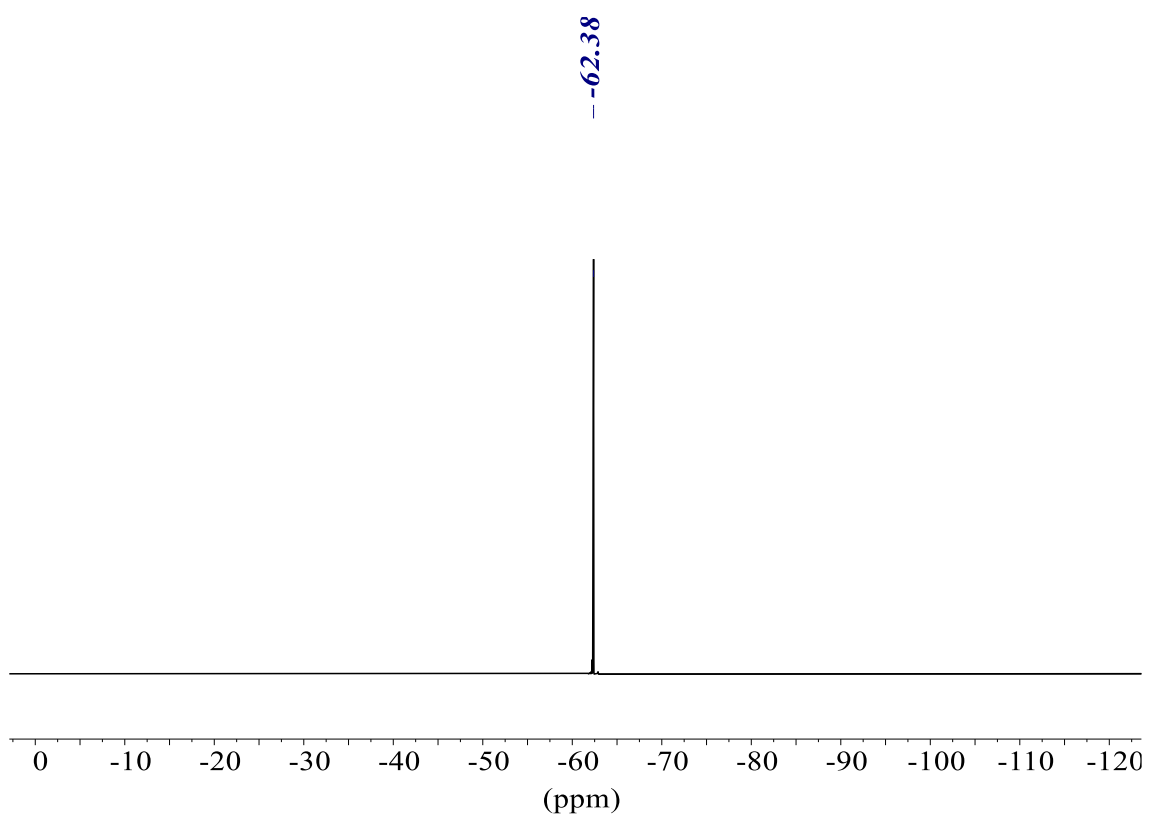

**HR-MS (ESI<sup>-</sup>  $m/z$ ) [M-H]<sup>-</sup>**  
 calculated for [C<sub>22</sub>H<sub>12</sub>F<sub>6</sub>O<sub>4</sub>P]<sup>-</sup>

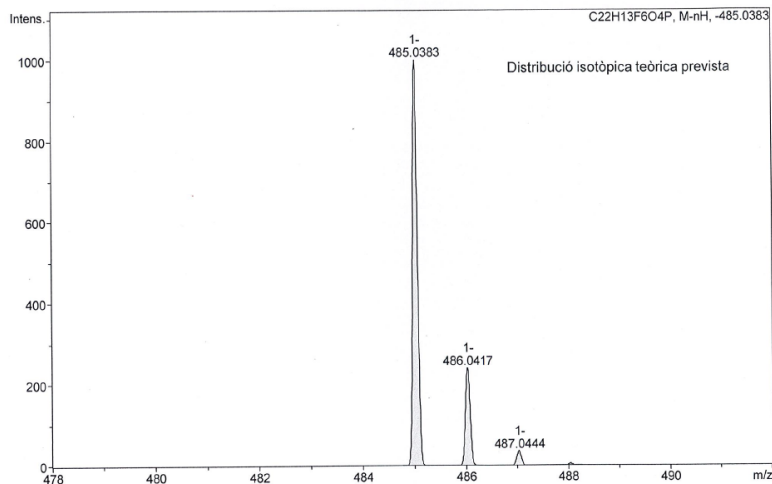

| # | $m/z$    | I    | I %   |
|---|----------|------|-------|
| 1 | 485.0383 | 1000 | 100.0 |
| 2 | 486.0417 | 241  | 24.1  |
| 3 | 487.0444 | 36   | 3.6   |

found

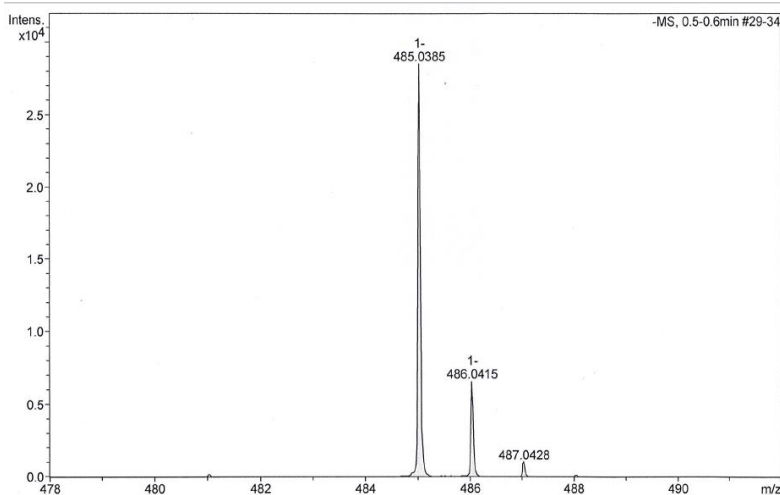

| # | $m/z$    | I     | I %   |
|---|----------|-------|-------|
| 1 | 485.0385 | 28499 | 100.0 |
| 2 | 486.0415 | 6598  | 23.2  |
| 3 | 487.0428 | 1028  | 3.6   |

MC5

$^1\text{H}$  (400.13 MHz,  $\text{CDCl}_3$ )

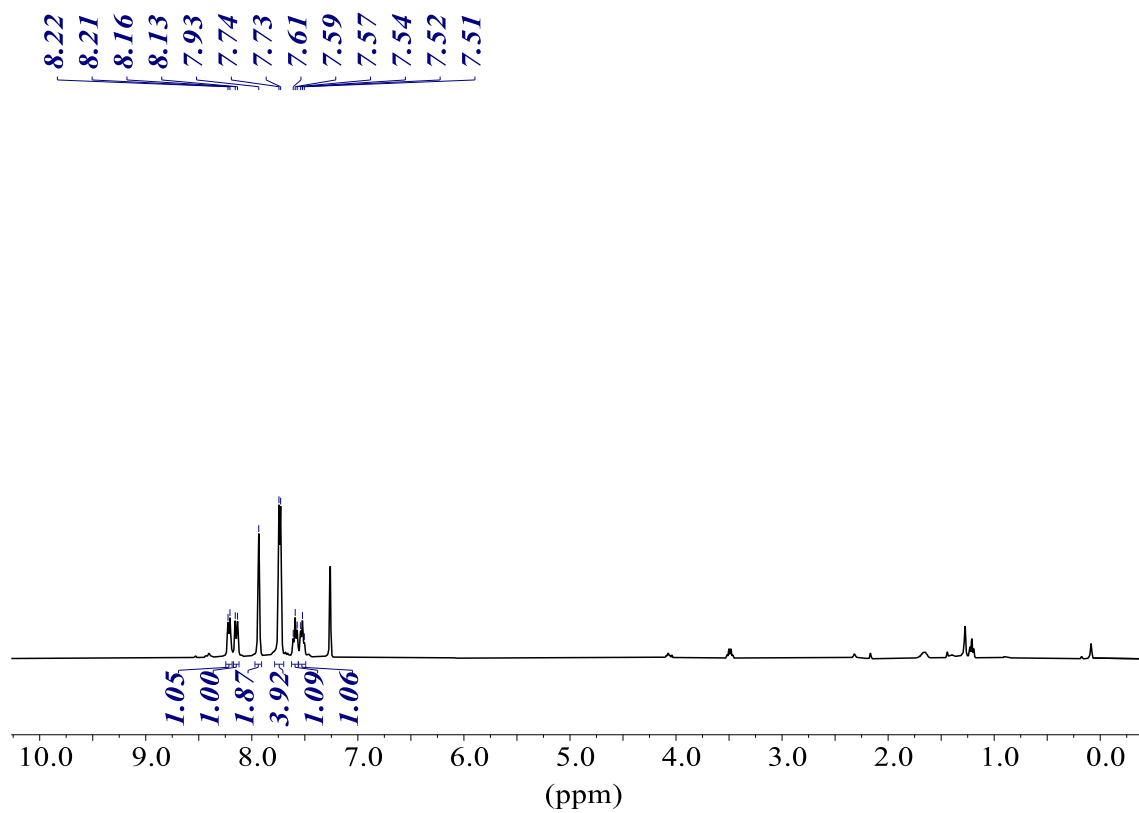

$^{13}\text{C}\{^1\text{H}\}$  (100.61 MHz,  $\text{CDCl}_3$ )

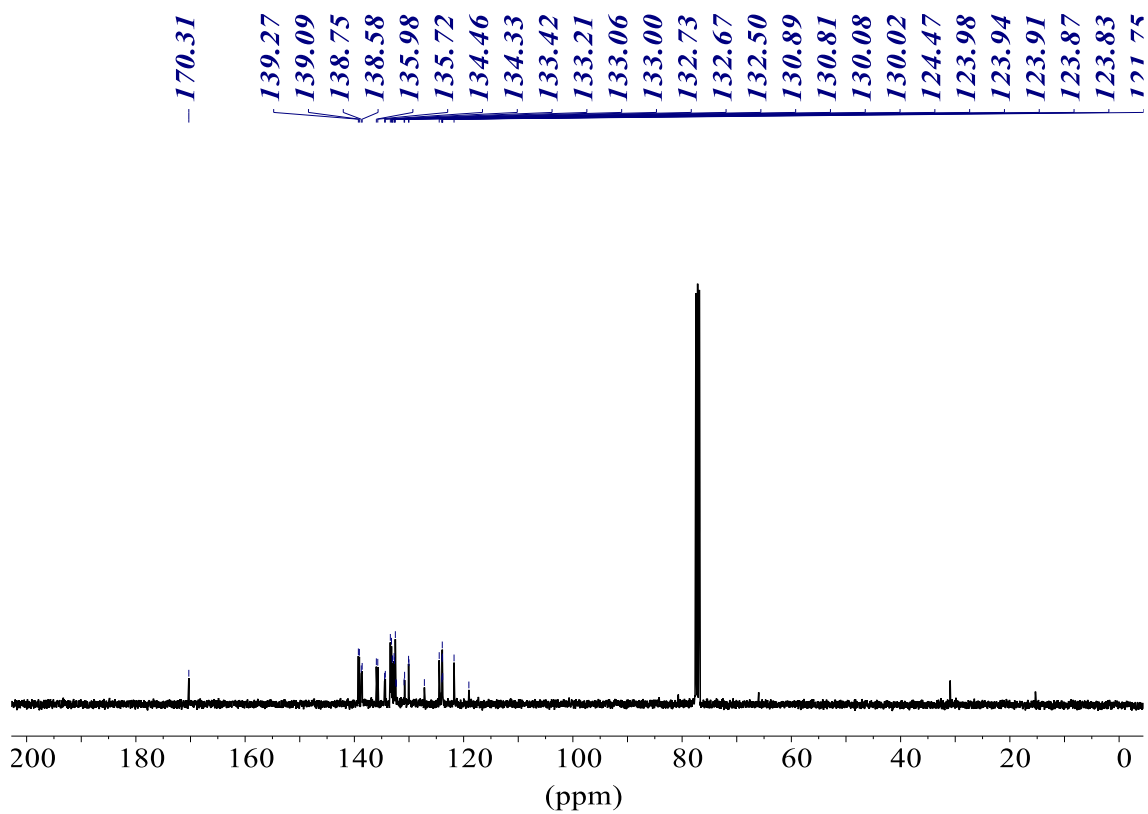

$^{31}\text{P}\{^1\text{H}\}$  (161.98 MHz,  $\text{CDCl}_3$ )

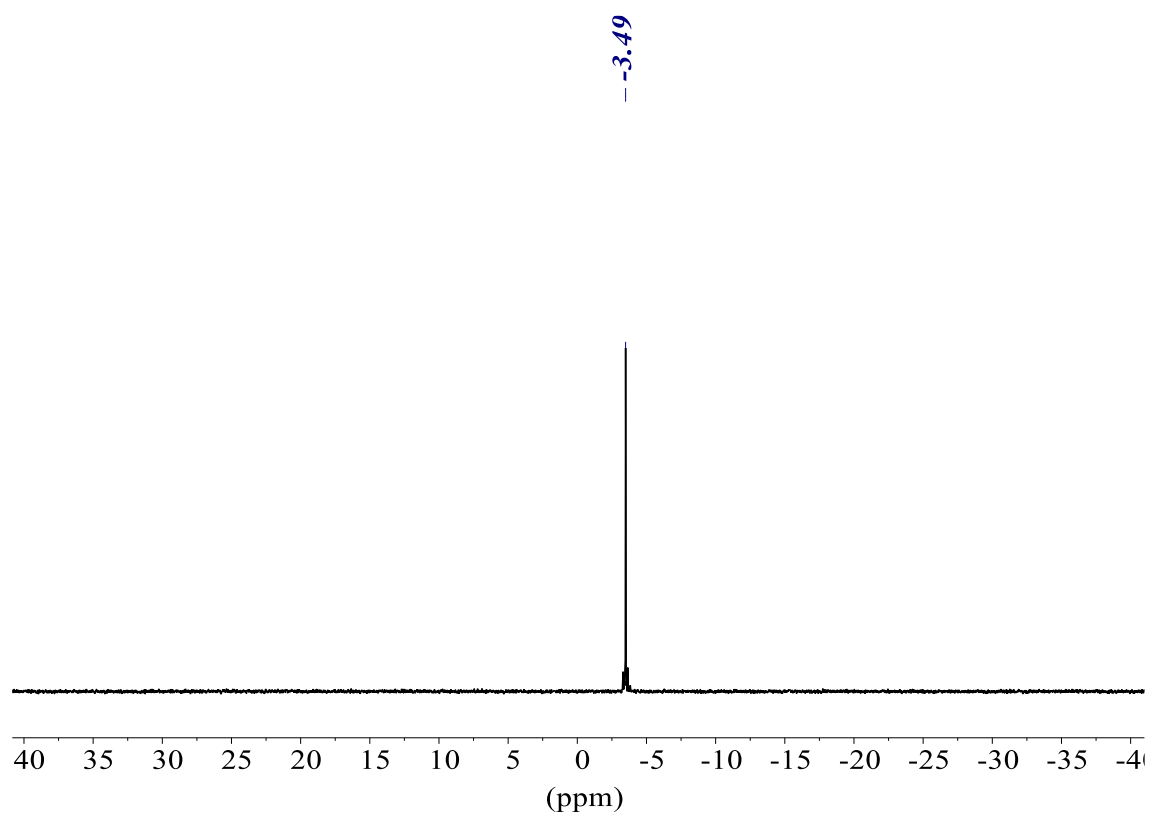

$^{19}\text{F}\{^1\text{H}\}$  (376.50 MHz,  $\text{CDCl}_3$ )

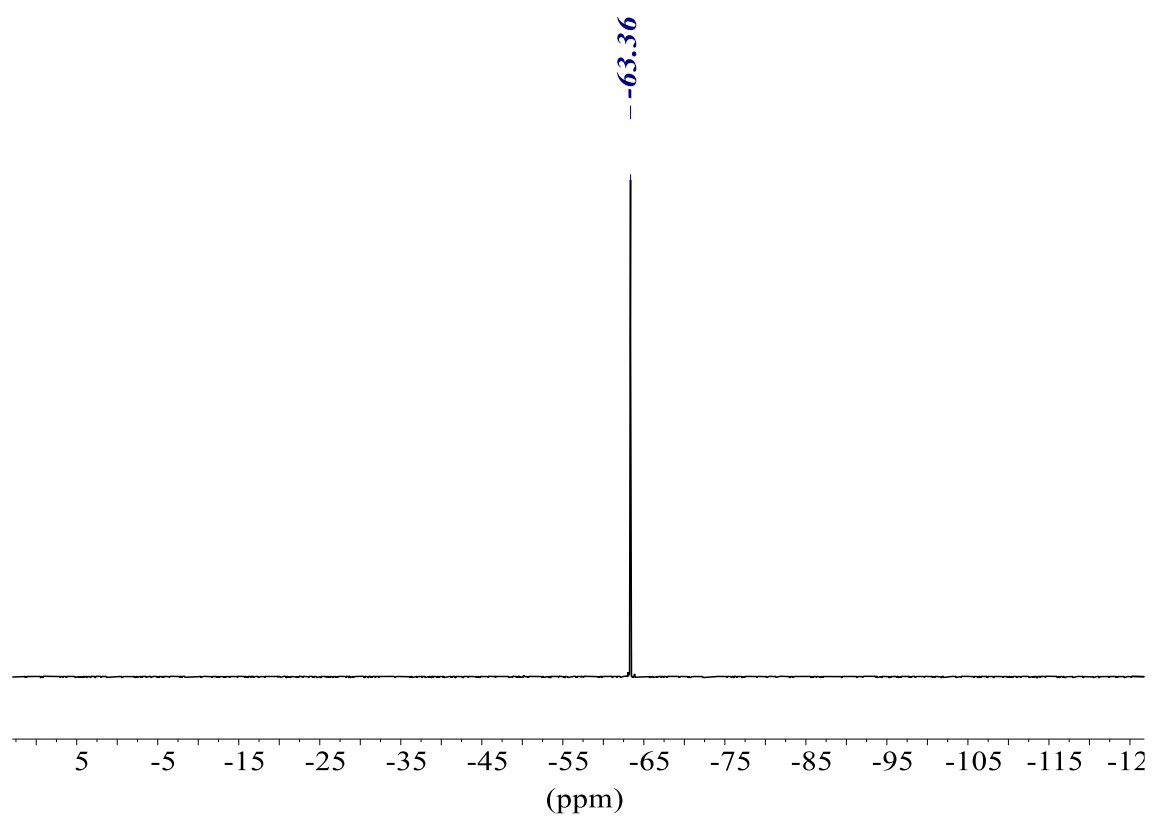

**HR-MS (ESI<sup>-</sup>  $m/z$ ) [M-H]<sup>-</sup>**  
 calculated for [C<sub>23</sub>H<sub>10</sub>F<sub>12</sub>O<sub>2</sub>P]<sup>-</sup>

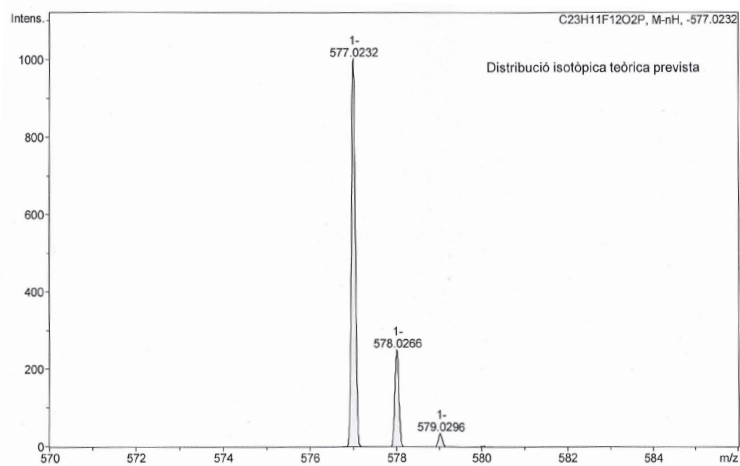

| # | $m/z$    | I    | I %   |
|---|----------|------|-------|
| 1 | 577.0232 | 1000 | 100.0 |
| 2 | 578.0266 | 250  | 25.0  |
| 3 | 579.0296 | 34   | 3.4   |

**found**

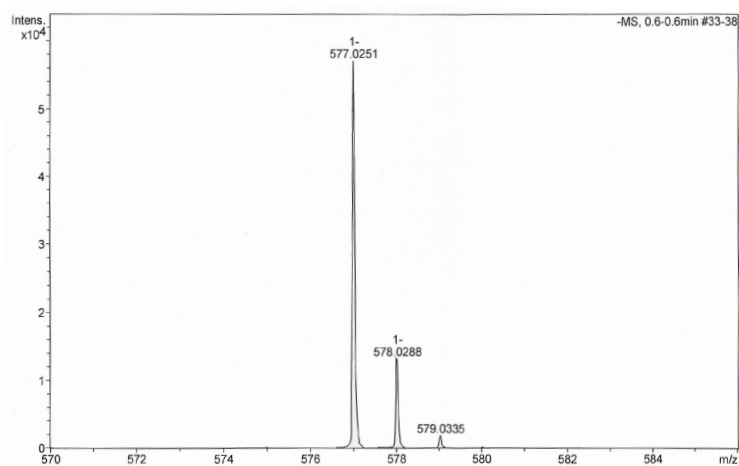

| # | $m/z$    | I     | I %   |
|---|----------|-------|-------|
| 1 | 577.0251 | 57043 | 100.0 |
| 2 | 578.0288 | 13250 | 23.2  |
| 3 | 579.0335 | 1891  | 3.3   |

**Pd-complex MC1**

$^1\text{H}$  (400.13 MHz, acetone- $d_6$ )

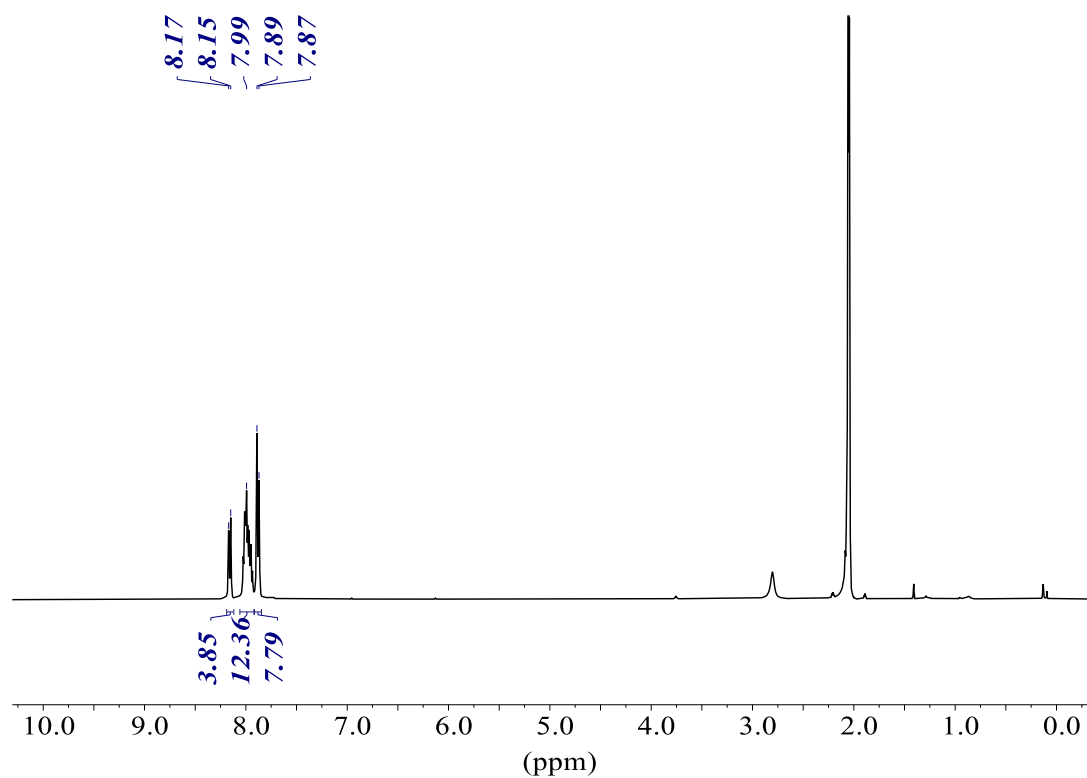

$^{31}\text{P}\{^1\text{H}\}$  (161.98 MHz, acetone- $d_6$ )

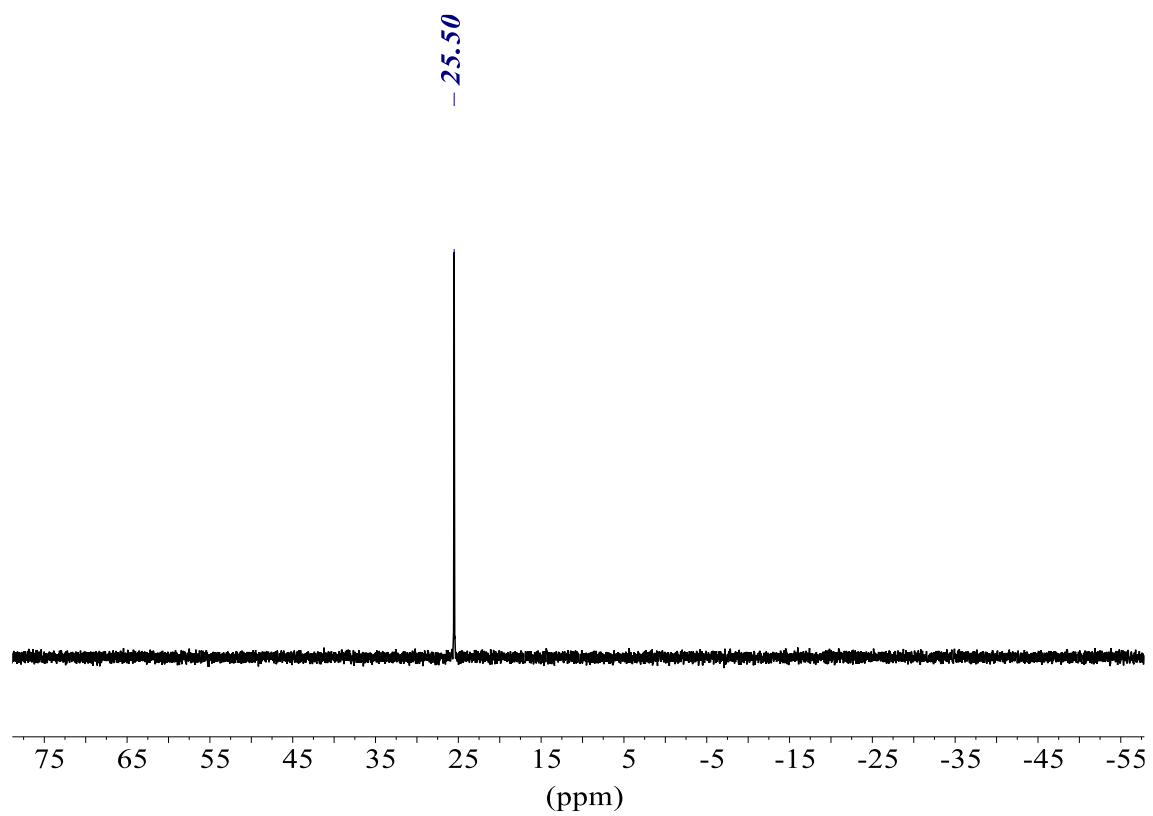



$^{19}\text{F}\{^1\text{H}\}$  (376.50 MHz, acetone-*d*6)

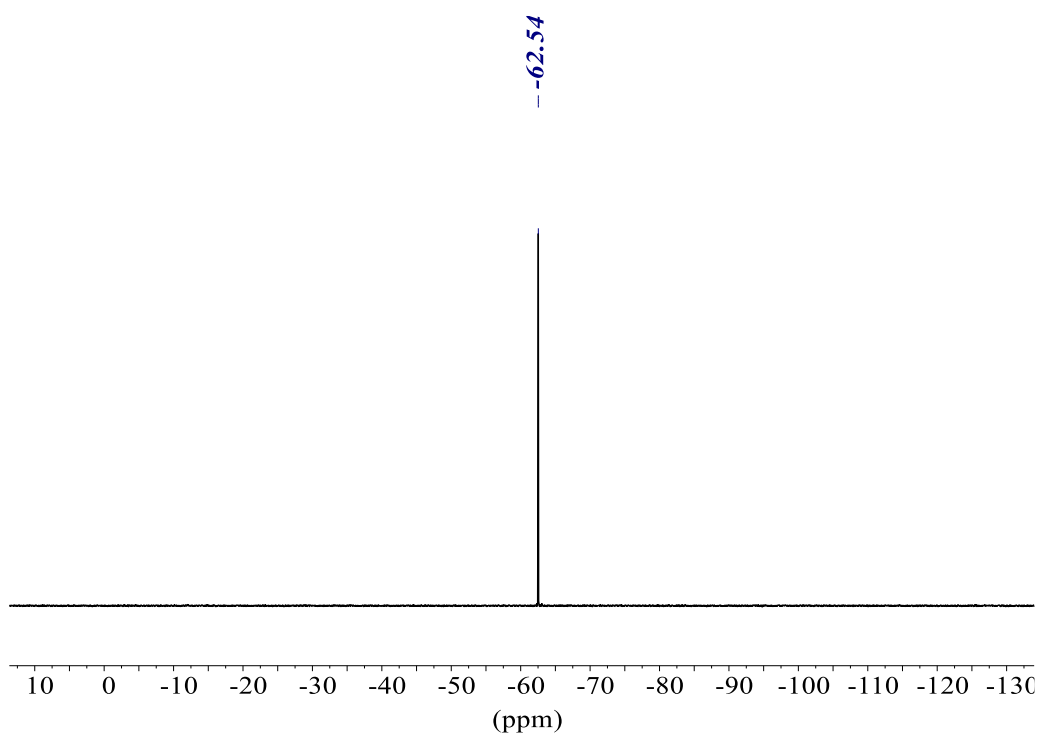

**HR-MS (ESI<sup>+</sup> *m/z*) [M+Na]<sup>+</sup>**

calculated for [C<sub>42</sub>H<sub>26</sub>Cl<sub>2</sub>F<sub>12</sub>O<sub>4</sub>P<sub>2</sub>PdNa]<sup>+</sup>

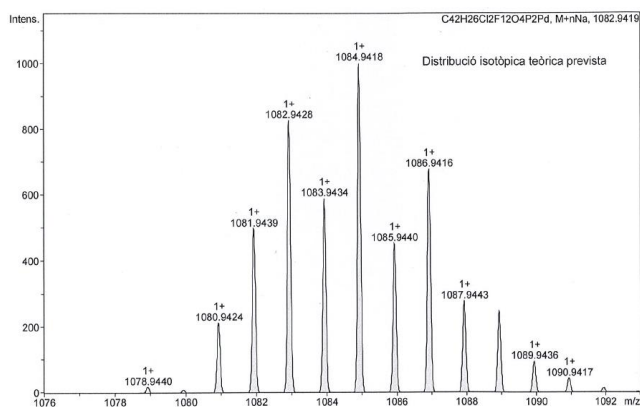

| #  | <i>m/z</i> | I    | I %   |
|----|------------|------|-------|
| 1  | 1078.9440  | 18   | 1.8   |
| 2  | 1080.9424  | 213  | 21.3  |
| 3  | 1081.9439  | 496  | 49.6  |
| 4  | 1082.9428  | 825  | 82.5  |
| 5  | 1083.9434  | 587  | 58.7  |
| 6  | 1084.9418  | 1000 | 100.0 |
| 7  | 1085.9440  | 452  | 45.2  |
| 8  | 1086.9416  | 677  | 67.7  |
| 9  | 1087.9443  | 278  | 27.8  |
| 10 | 1088.9415  | 248  | 24.8  |
| 11 | 1089.9436  | 94   | 9.4   |
| 12 | 1090.9417  | 43   | 4.3   |
| 13 | 1091.9430  | 13   | 1.3   |

found

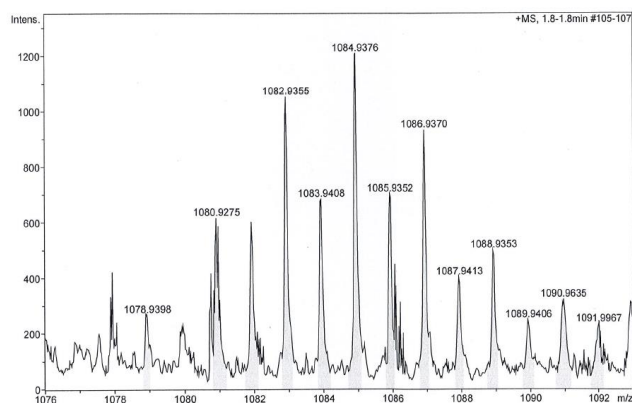

| #  | <i>m/z</i> | I    | I %   |
|----|------------|------|-------|
| 1  | 1078.9398  | 269  | 22.3  |
| 2  | 1080.9275  | 617  | 51.1  |
| 3  | 1081.9453  | 604  | 50.0  |
| 4  | 1082.9355  | 1053 | 87.2  |
| 5  | 1083.9408  | 683  | 56.6  |
| 6  | 1084.9376  | 1207 | 100.0 |
| 7  | 1085.9352  | 702  | 58.2  |
| 8  | 1086.9370  | 932  | 77.2  |
| 9  | 1087.9413  | 403  | 33.4  |
| 10 | 1088.9353  | 501  | 41.5  |
| 11 | 1089.9406  | 249  | 20.6  |
| 12 | 1090.9635  | 324  | 26.8  |
| 13 | 1091.9967  | 235  | 19.4  |

# Pd-complex MC2

$^1\text{H}$  (400.13 MHz, acetone- $d_6$ )

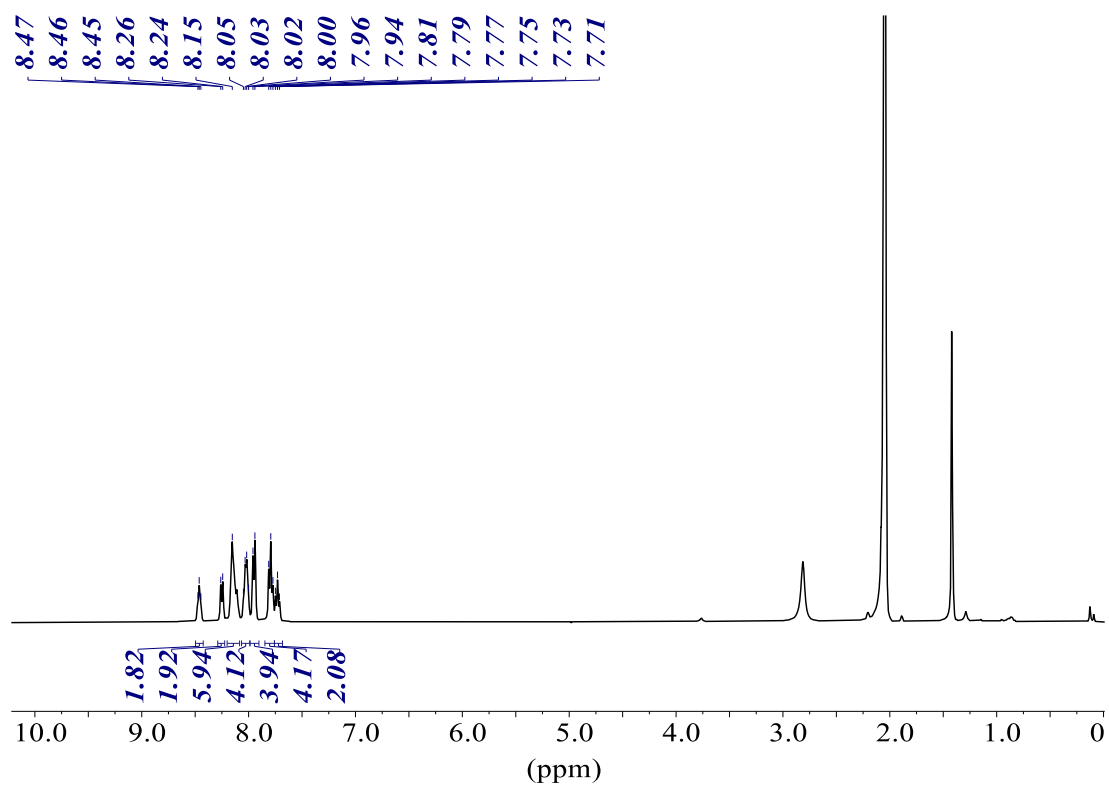

$^{31}\text{P}\{^1\text{H}\}$  (161.98 MHz, acetone- $d_6$ )

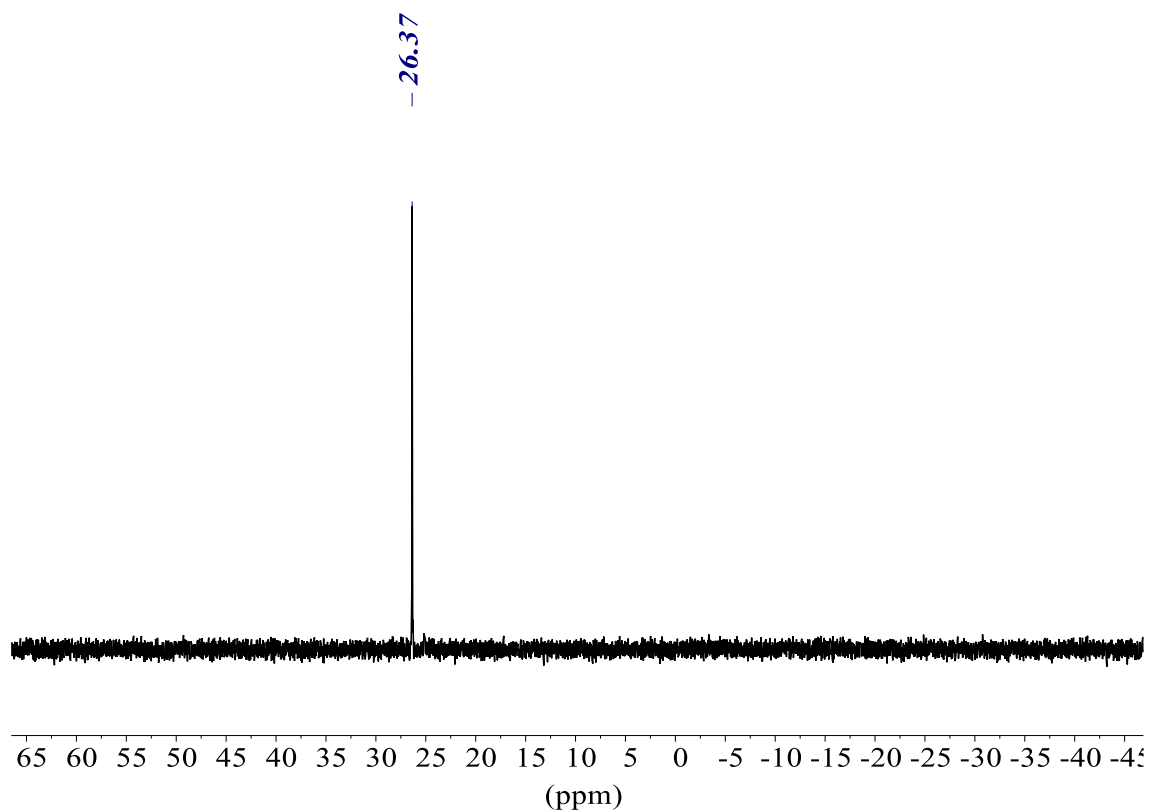

$^{19}\text{F}\{^1\text{H}\}$  (376.50 MHz, acetone-*d*<sub>6</sub>)

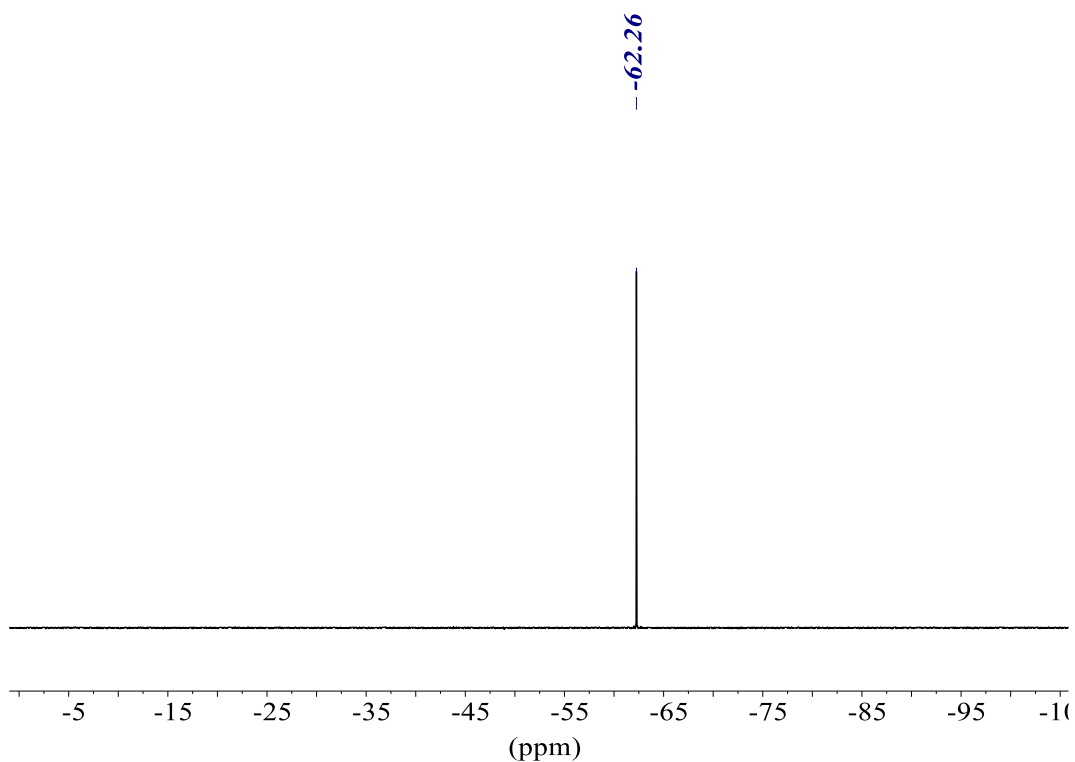

**HR-MS (ESI<sup>+</sup> *m/z*) [M+Na]<sup>+</sup>**

calculated for [C<sub>42</sub>H<sub>26</sub>Cl<sub>2</sub>F<sub>12</sub>O<sub>4</sub>P<sub>2</sub>PdNa]<sup>+</sup>

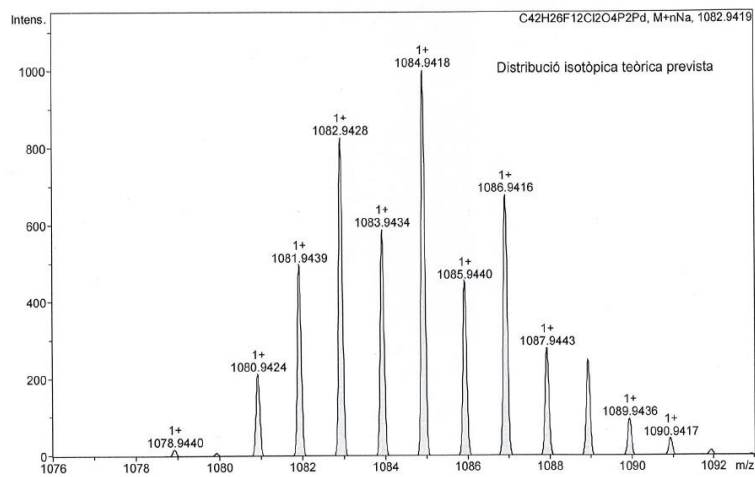

| #  | <i>m/z</i> | I    | I %   |
|----|------------|------|-------|
| 1  | 1078.9440  | 18   | 1.8   |
| 2  | 1079.9474  | 8    | 0.8   |
| 3  | 1080.9424  | 213  | 21.3  |
| 4  | 1081.9439  | 496  | 49.6  |
| 5  | 1082.9428  | 825  | 82.5  |
| 6  | 1083.9434  | 587  | 58.7  |
| 7  | 1084.9418  | 1000 | 100.0 |
| 8  | 1085.9440  | 452  | 45.2  |
| 9  | 1086.9416  | 677  | 67.7  |
| 10 | 1087.9443  | 278  | 27.8  |
| 11 | 1088.9415  | 248  | 24.8  |
| 12 | 1089.9436  | 94   | 9.4   |
| 13 | 1090.9417  | 43   | 4.3   |
| 14 | 1091.9430  | 13   | 1.3   |

found

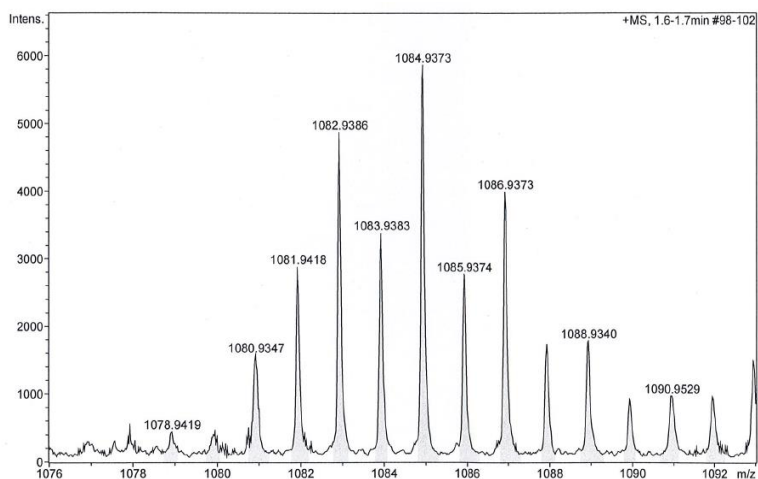

| #  | m/z       | I    | I%    |
|----|-----------|------|-------|
| 1  | 1078.9419 | 451  | 7.7   |
| 2  | 1079.9383 | 418  | 7.1   |
| 3  | 1080.9347 | 1579 | 27.0  |
| 4  | 1081.9418 | 2887 | 49.3  |
| 5  | 1082.9386 | 4870 | 83.1  |
| 6  | 1083.9383 | 3384 | 57.8  |
| 7  | 1084.9373 | 5857 | 100.0 |
| 8  | 1085.9374 | 2776 | 47.4  |
| 9  | 1086.9373 | 3993 | 68.2  |
| 10 | 1087.9398 | 1739 | 29.7  |
| 11 | 1088.9340 | 1789 | 30.5  |
| 12 | 1089.9376 | 923  | 15.8  |
| 13 | 1090.9529 | 978  | 16.7  |

<sup>i</sup> D. Herrera, D. Peral, M. Córdón, J.C. Bayón, *Eur. J. Inorg. Chem.*, 2021, 354–363

<sup>ii</sup> Bruker, SADABS, Bruker Analytical X-Ray Division, Madison 2001

<sup>iii</sup> G. M Sheldrick, *Acta Cryst. Sect. A Found. Crystallogr.* 2008, **64**, 112–122.

<sup>iv</sup> L. J. Farrugia, *J. Appl. Crystallogr.* 1999, **32**, 837–838.

<sup>v</sup> a) A. L. Spek, *Acta Crystallogr.* 2009, D65, 148-155; b) A. L. Spek, *Acta Crystallogr. C Struct. Chem.* 2005, **71**, 9-18
